# Supplementary material for: Targeted and complete genomic sequencing of the major histocompatibility complex in haplotypic form of individual heterozygous samples
Source: HighWire-hosted journal article supplement (doi:10.1101/gr.278588.123), 2024-09-26
Supplement: Supplemental_Methods.docx [file Supplemental_Methods.docx]

# Supplemental Methods:

## MHC Reference Construction

In order to identify MHC specific reads, a panel of reference MHC sequences was created using a combination of haplotypes included in the hg38 reference build and haplotype assemblies generated by the Human Pangenome Reference Consortium (HPRC)(Liao et al. 2023) and the Human Genome Structural Variation Consortium (HSGSVC)(Ebert et al. 2021). The haplotypes were restricted between the genes *MOG* and *DAXX* of the MHC region. The reference panel was used to perform initial targeted MHC reference selection to select out reads; however, they were not used in later steps to perform alignment, variant calling, phasing, and final assemblies. This allowed *de novo* assembly so; the final assemblies are independent of existing reference sequences.

41 HPRC Freeze 1 (v2) HiFi assemblies uploaded to Genbank were downloaded from the public Amazon S3 bucket: https://s3-us-west-2.amazonaws.com/human-pangenomics/index.html?prefix=working/. 35 HSGSVC assemblies were downloaded from the public ftp site: http://ftp.1000genomes.ebi.ac.uk/vol1/ftp/data_collections/HGSVC2/release/v1.0/assemblies/. Assemblies generated using HiFi data were selected when possible. This set of assemblies included 31 African, 20 American, 12 East Asian, 7 European and 6 South Asian samples for a total of 152 haplotypes.

Assemblies were aligned to chr6 using minimap2 (Li 2018) (v2.24: -a -x asm20 -m 10000 -z 10000,50 -r 50000 –end-bonus=100 –secondary=no -t8 –cs -O 5,56 -E 4,1 -B 5). Contigs that aligned between *MOG* and *DAXX* were retained for the reference panel. Contigs that extended beyond the boundary genes were trimmed to -5 kb from the start of *MOG* or +5 kb from the end of *DAXX*.

The 7 alternative MHC sequences (https://www.ucl.ac.uk/cancer/research/department-cancer-biology/medical-genomics-past-projects/mhc-haplotype-project) included in the hg38 build were restricted to the region between *MOG* and *DAXX*.

The final reference sequence set included the entire hg38 genomic sequence, the 7 alternative MHC sequences and 152 assembled haplotypes restricted to the region between *MOG* and *DAXX*. The COX+PGF capture was aligned to the same reference with COX removed and the hg38 MHC sequence, which is PGF, masked. This was for validation purposes to confirm that proper MHC read identification could be done on these samples without explicitly using their own reference sequence for alignment.

## MHC Read Identification

The constructed MHC reference was then used to isolate the MHC-specific reads in the capture. Prior to MHC identification, reads were downsampled to a set number to gauge the cost per sample. Initial testing showed that 600K HiFi reads was adequate for a high-quality MHC assembly. This would allow 2 to 3 samples per flowcell depending on capture rate and sequencer output. Based on these numbers, Sequel II samples with more than 600K reads were randomly downsampled to 600K using seqtk sample (Li 2023) (v1.4).

Sequel reads were of lower quality and were not downsampled to a set number of reads. Instead, EUR_P and EUR_F downsampling was done to target about 190K MHC reads, prioritizing reads with the highest RQ values, as reported by the PacBio CCS tool. EUR_M has lower MHC on-target numbers, so all reads were retained for further analysis.

Downsampled PacBio reads were aligned against hg38 and the previously described MHC reference panel (Section: MHC Reference Construction) using minimap2 (v2.21: --secondary=no -Y -a -x map-hifi/map-pb). Sequel samples were aligned using the map-pb preset and Sequel II samples were aligned using map-hifi. Reads with primary alignments to any MHC sequence were retained for further analysis.

The RSE methodology results in uneven coverage across the MHC, so the coverage was flattened in the Sequel II samples using the khmer software package command normalize-by-median.py (v3.0.0a3) (Crusoe et al. 2015), using a k-mer size of 31 bp and a targeted depth of 250. This approach is only appropriate for the accurate HiFi reads, so was not run on the Sequel samples, which contain a mix of HiFi and lower quality reads.

## MHC Read Editing by Overlap

Prior to assembly, MHC specific reads must be edited to remove chimeras introduced by whole genome amplification(Lasken and Stockwell 2007; Warris et al. 2018; Kiguchi et al. 2021). Most of the chimeras are palindromic, meaning the second segment of the chimera is an inverted repeat of the first. Non-palindromic chimeras are also observed, where the segments are nearby each other in the genome, but are either non-adjacent or inverted with respect to the genome. If chimeras are not removed prior to assembly, they could be incorporated into individual contig sequences or cause confusion in the assembly, resulting in highly fragmented contigs. Reads were edited by identifying potential chimeric boundaries in each PacBio read and then splitting the read at these breakpoints using a method adapted from SACRA (Kiguchi et al. 2021).

Overlaps between MHC-specific reads were found using minimap2 (v2.17: -x ava-pb -I 20G -m 200 –dual=yes). Reads with excessive chimeras, defined as 16 or more self-overlaps longer than 1 kb, were removed from the analysis. All overlaps to a given query read were checked for early termination points, which were defined as starting and/or ending coordinates more than 100 bp from the boundaries of both reads in the overlap. The exact termination site of each overlap is imperfect due to sequencing errors and variable chimeras in each read. So, to identify the most likely breakpoint location, we looked for a buildup of early termination points using a window approach. Query read coordinates with 3 or more early termination points were retained as potential breakpoints. A 50 bp window was centered on each of these potential breakpoints and all coordinates within the window were checked for early termination points. A window score was calculated by adding the early termination point count of the central position to the early termination point count-1 of all other coordinates in the window. All potential breakpoints for the query read were ranked by the window score. If the windows of two potential breakpoints overlap, only the potential breakpoints with the higher score was retained. Overlaps that do not terminate at the potential breakpoint, but instead pass through with at least 100 bp of overhang suggest no chimera, so the breakpoint percentage was calculated using the formula 100 * window score / (window score + pass through reads).

The final breakpoints for each query read was determined by the breakpoint percentage and the k-mer depth across the read. The median k-mer depth across each HiFi read was calculated using all k-mer counts generated by Jellyfish (Marçais and Kingsford 2011) on the MHC-specific read set (v2.3.0: -L 2 -C -51). Potential breakpoints with breakpoint percentage >= 20% were retained if the median k-mer depth was less than 20. If the median k-mer depth was 20 or higher, the potential breakpoint retention is more aggressive and set to 10%. Potential breakpoints were also rejected if the median k-mer count was at least 20 and the k-mer centered on the potential breakpoint was common in the dataset, defined as potential breakpoint k-mer count / median k-mer count greater than 0.15.

Low quality reads in the Sequel samples can’t be checked reliably for k-mers, so the breakpoint threshold was simply 20%.

Each query read was split into edited reads using the final list of breakpoints. Edited reads were retained if longer than 1 kb.

## Collapsed *De Novo* Assembly

Edited MHC reads were assembled using Canu (Koren et al. 2017) (v1.8: “batOptions=-dg 3 -db 3 -dr 1 -ca 500 -cp 50” genomeSize=3.5). Sequel samples were corrected and trimmed by Canu prior to assembly (corOutCoverage=300 -pacbio-raw). Sequel II samples were not corrected (-pacbio-corrected) but were trimmed prior to assembly.

The resulting assembly was filtered to remove off-target and poorly supported contigs. Contigs were considered off-target if no portion of the sequence aligned to chr6 between *MOG* and *DAXX* with minimap2 (v2.24: -x map-hifi –secondary=no). Contigs were considered poorly supported if the edited reads comprising the contig originated from fewer than 10 raw PacBio reads.

The assembly was further filtered to remove both chimeric and redundant contigs. Overlaps between contigs were generated using minimap2 (v2.24: -x map-hifi -D), retaining overlaps shorter than 40 kb and with at least 96% identity. Contigs with self-overlaps representing 25% of the contig length were removed. Contigs that were 90% overlapped with a single longer contig or were 98% overlapped with multiple longer contigs were removed.

## MHC Read Editing by Alignment

Breaking up chimeras using overlaps is imperfect due to variable read quality, imprecise overlap boundaries and the general complexity of finding overlaps when both reads have numerous and disparate chimeras. Once the initial assembly is created, the overlap edited reads are discarded, and MHC-specific reads are re-edited with the guidance of the newly generated assembly. The reference panel could have been used to perform a single edit, but the edited read boundaries would have been determined by non-self and the assembly wouldn’t have been fully *de novo*.

Unedited MHC reads were aligned to the filtered contigs using minimap2 (v2.24: -x map-hifi –secondary=no -a -Y). Lower quality reads in the Sequel samples were aligned separately (v2.24: -x map-pb –secondary=no -a -Y) and merged with the HiFi reads after alignment. The sequence of the first *RCCX* copy in PGF was also aligned to the filtered contigs using minimap2 (v2.24: -x map-hifi), retaining alignments longer than 1 kb, thus identifying the *RCCX* locations within the assembly. MHC reads that fall within these *RCCX* intervals were removed from any further assembly steps using BEDTools intersect (Quinlan and Hall 2010) (v1.16).

Chimeric segments of the unedited MHC reads will largely align to separate locations in the contigs as one primary alignment and multiple supplementary alignments, thus breaking up chimeras. The alignment file was processed to convert each alignment location of the unedited MHC read into an independent edited read. Only alignments with scores higher than 1K and alignment lengths longer than 1 kb were converted and retained. The resulting alignment edited reads were longer and had more accurate boundaries than the overlap edited set, aside from reads aligning to contig edges, which were treated separately later in the pipeline.

## Haplotype Scaffold

Reference-based phasing across the MHC was used to orient locally phased PacBio variant blocks. First, unedited MHC-specific reads were aligned to hg38 chr6 using minimap2 (v2.24 --secondary=no, -a -x map-hifi], retaining only primary alignments with mapping qualities of at least 1. SNPs were called using Longshot (v0.4.5 --min_alt_frac 0.12 --min_alt_count 6 -q 0 -P 0.001 -v Infinium.vcf.gz) only at locations on the Illumina Infinium Omni2.5-8v3 array. This restrictive SNP calling was done to both avoid false calls within difficult regions of the MHC and to assist phase estimation with SHAPEIT4 (Delaneau et al. 2019) (v4.2.2). The resulting SNP calls were annotated with dbSNP IDs and filtered to remove low quality (QUAL < 50) and homozygous variants.

After filtering, MHC-specific reads were used to phase SNPs were possible using WhatsHap (Martin et al. 2016) (v1.7 default settings). Phase was estimated using SHAPEIT4 (-H 1kGP_high_coverage.bcf -R chr6 --map chr6.b38.gmap.gz --pbwt-depth 8 --use-PS 1e-20 --mcmc-iterations 10b,1p,1b,1p,1b,1p,1b,1p,10m -- sequencing) on any SNP unphased with reads. Phased variant calls across 2504 unrelated 1KG samples sequenced to 30x coverage (Byrska-Bishop et al. 2022) were used as the SHAPEIT4 reference panel. The reference panel was restricted to biallelic SNVs using BCFtools view (Danecek et al. 2021) (v1.17 -m2 -M2 -v snps).

As a comparison, haplotype phase was also determined across the two trios using mendelian inheritance logic. SNPs that are heterozygous across all samples have ambiguous phase, so SHAPEIT4 predictions were used.

The SHAPET4 and trio phasing were compared to determine the level of phase switch errors in the prediction. The overall phasing error rate was 0.048% (7 / 14,663), coming from 4 phasing ‘blips’, (two or fewer out of phase positions), which should not affect assembly and 3 long phase switches which introduces error. The SHAPEIT4 predictions for EUR-F, EUR-P, EAS-P and EAS-F were free of long phase switches, EUR-M and EAS-M had at least one. The four assemblies presented in this manuscript relied on the SHAPEIT4 predictions only. The parental assemblies used for accuracy calculation relied on the trio-based phasing.

SNP genotyping can also be secured using the Infinium Omni2.5-8v3 platform itself. While this is an added cost, it allows for more reliable genotyping across regions that are insufficiently captured by RSE.

## SNV calling and Haplotype Partitioning

Haplotype partitioning is done by calling and phasing SNVs across the contigs using PacBio data and then intersecting the phased calls with the reference-based haplotype scaffold which has been organized into haplotypes by trio data or computational haplotype estimation. Reads within each phased block are phased locally and the scaffold is used to orient the local phasing to the larger haplotype.

The first step is to call SNVs across the collapsed assembly using the alignments generated previously (Section: MHC Read Editing by Alignment). SNVs were called using Longshot (Edge and Bansal 2019) (v0.4.5: --het_snv_rate 0.005 –hom_snv_rate 0.0001 -q 30 –min_alt_count 10). Only the primary alignment of each unedited MHC read was used for SNV calling. The SNV calls were split into homozygous alternate and heterozygous calls. Homozygous alternate calls are likely assembly errors, which could degrade read partitioning, so the contig sequences were modified to reflect the calls using BCFtools (v1.16) consensus. Considering that only microarray sites are used in the scaffold and microarray data is mostly SNPs, InDel errors are not detected or corrected. The number of corrections is limited, 4-30 in the Sequel II samples and 70 in the SequeI I sample.

Next, WhatsHap phase (v1.7) was used to phase heterozygous SNVs into haplotype blocks using all edited reads. Isolated heterozygous positions (a single SNV), located up to 3 kb away from the closest phased location (contig), were defined as their own single block with a length of 1 bp to retain for further processing steps when blocks are placed using the scaffold. Finally, WhatsHap haplotag was used to assign block-specific haplotypes to the edited reads in the alignment file.

The 60 bp flanking sequences (hg38) of each scaffold SNP, were aligned to the filtered contigs using BWA (v0.7.15)(Li and Durbin 2009). Alignments with two or fewer mismatches and no trimming were retained. If the upstream and downstream sequences aligned within a single bp of each other in the same orientation, the intervening coordinate was recorded as a scaffold SNP location along with the phased nucleotides generated by trio or estimation.

All SNPs within each WhatsHap haplotype block were compared to the set of scaffold SNP locations. When matching coordinates were found, the phased nucleotides from the PacBio data were compared to the phased nucleotides from the scaffold. If the bases match, the position was assigned haplotype1. If the bases match after switching the phase of the PacBio call, the position was assigned haplotype2. If the assignments switched between haplotypes mid-block, the block was split into two new blocks.

Any contig region outside of phased blocks (unphased regions) can be either homozygous or hemizygous, as highly divergent regions of the MHC can assemble as separate contigs, each appearing homozygous when SNV calling. To differentiate homozygous from hemizygous, each unphased region was checked for the presence of intersecting scaffold SNPs. Scaffold SNP locations were retained if the coverage depth used for contig SNV calling was at least 30x, as low coverage can mask true heterozygous positions, falsely making a region appear haploid. The base on the contig was compared against the phased scaffold genotypes to determine the potential haplotype. A haplotype was only assigned to the unphased region if 75% of the intersecting SNPs have the same haplotype and there were enough observations. The minimum number of observations was dependent on the size and location of the unphased region, for a total of three categories: 1) unphased regions flanked by two phased regions required 5 SNPs, 2) long unphased regions (>=50 kb) at the edges of contigs required 2 SNPs and 3) short unphased regions (<50 kb) at the edges of contigs required 1 SNPs. Ends of contigs were assigned more aggressively since they are more likely to be haploid. Unphased regions without enough heterozygous scaffold SNPs or with inconsistent haplotype assignments were considered homozygous.

Reads within each phased block were assigned a haplotype based on the block assignment and the read-specific haplotag, if present, otherwise untagged reads are assigned to both haplotypes. Reads within each haploid region were assigned the region haplotype, unless previously assigned. Reads that fell within unassignable phased blocks or outside of both haplotype blocks and haploid regions, likely homozygous regions, were assigned to both haplotypes.

## Haplotype-Specific *De Novo* Assembly

The newly partitioned reads could then be assembled separately, which is an easier task than a fully diploid assembly. Prior to this assembly, partitioned reads were selected so that the haplotype-specific coverage across each collapsed contig was around 80x. First, haplotype-specific reads were aligned to the collapsed contigs using minimap2 (v2.24: -x map-hifi –secondary=no -a). Alignments with non-zero mapping quality scores were sorted by decreasing alignment score. The read was retained if at least 100 coordinates were beneath 80x considering previously retained reads.

Reads that align at the edges of contigs will be truncated when using the alignment-based editing method, so they were re-edited using the overlap method described previously (Section: MHC Read Editing by Overlap), using only haplotype-specific reads to improve chimera detection. First, unedited haplotype-specific reads are aligned to the filtered contigs using minimap2 (v2.24 -x map-hifi –secondary=no -a). Reads that align within 500 bp of the contig edges are edited using overlaps found with reads that align within 4 kb of the contig edges. The newly edited reads are added to the capped read pool, replacing the truncated versions.

The Sequel samples contain mostly low-quality reads that must be corrected before assembly using Canu (v1.8 -correct correctedErrorRate=0.035 -pacbio-raw). The correction of HLA Class I genes is often difficult due to the similarity between genes, as are L1 repeats. The locations of these regions were identified in the contigs and the reads within were corrected using Canu (v1.8 -correct corOverlapper=ovl -pacbio-raw), run on each region separately. The corrected reads were combined with the HiFi reads prior to assembly.

Each haplotype was assembled separately using Canu (Sequel: utgOvlErrorRate=0.065 trimReadsCoverage=2 -pacbio-corrected contigFilter=”20 5000 0.5 0.5 20”, Sequel II: utgOvlErrorRate=0.02 -pacbio-corrected contigFilter=”20 5000 0.5 0.5 20”).

## Haplotype-Specific Patched *De Novo* Assembly

Haplotigs can end prematurely when the assembler encounters reads with unedited chimeras or overcorrected sequence. A second round of assembly is performed after re-editing and correcting reads found at the ends of each haplotig.

This first required re-editing of reads that aligned to the haplotig edges. Unedited PacBio reads were aligned to a combined reference of the haplotig plus hg38 without MHC sequences using minimap2 (v2.24: -x map-hifi –secondary=no -a). Next, overlaps were found between haplotig using minimap2 (v2.24: -x map-hifi -D -c). If a contig haplotig with another haplotig within 2 kb of its edge, the boundary distance is set to the end of the overlap. If there is no haplotig overlap, the boundary distance is set to 500 bp. Reads that align between the edge and the boundary distance are edited using the overlap method described previously (Section: MHC Read Editing by Overlap). Overlaps were only found between reads at the same edge, unless two edges overlap.

Sequel low-quality reads were corrected independently for each edge or pair of overlapping edges using Canu (v1.8: -correct corOverlapper=ovl -pacbio-raw). Re-edited edge reads are added to the read pool used in the first assembly, replacing the original versions. Reads were assembled using Canu with the same settings as the first round of assembly.

## *De Novo* Assembly Polishing

Occasionally, haplotigs from the second assembly had breaks that were not in the first assembly so, a final round of assembly clean-up was performed. Breaks were patched by aligning the 5 kb sequence at the ends of each second assembly haplotig to the first assembly using minimap2 (v2.24: -x map-hifi -c). If two different haplotig edges align within 5 kb of each other on the first assembly, the contigs were merged using the sequence from the first assembly.

When coverage across a region is low, haplotigs can terminate in a chimera, due to lack of coverage for accurate editing. Terminal chimeras were identified and removed by finding haplotig self-overlaps using minimap2 (v2.24: -x map-hifi -D -c). Finally, minimus2 was used to merge overlapping haplotigs after removing terminal chimeras (Treangen et al. 2011) (v3.1.0: -D OVERLAP=100 -D CONSERR=0.02 -D MAXTRIM=500). Discrepant bases found in the overlapping region are set to Ns in the assembly.

References:

Byrska-Bishop M, Evani US, Zhao X, Basile AO, Abel HJ, Regier AA, Corvelo A, Clarke WE, Musunuri R, Nagulapalli K, et al. 2022. High-coverage whole-genome sequencing of the expanded 1000 Genomes Project cohort including 602 trios. *Cell* **185**: 3426-3440.e19.

Crusoe MR, Alameldin HF, Awad S, Boucher E, Caldwell A, Cartwright R, Charbonneau A, Constantinides B, Edvenson G, Fay S, et al. 2015. The khmer software package: enabling efficient nucleotide sequence analysis. *F1000Res* **4**: 900.

Danecek P, Bonfield JK, Liddle J, Marshall J, Ohan V, Pollard MO, Whitwham A, Keane T, McCarthy SA, Davies RM, et al. 2021. Twelve years of SAMtools and BCFtools. *Gigascience* **10**: giab008.

Delaneau O, Zagury J-F, Robinson MR, Marchini JL, Dermitzakis ET. 2019. Accurate, scalable and integrative haplotype estimation. *Nat Commun* **10**: 5436.

Ebert P, Audano PA, Zhu Q, Rodriguez-Martin B, Porubsky D, Bonder MJ, Sulovari A, Ebler J, Zhou W, Serra Mari R, et al. 2021. Haplotype-resolved diverse human genomes and integrated analysis of structural variation. *Science* **372**: eabf7117.

Edge P, Bansal V. 2019. Longshot enables accurate variant calling in diploid genomes from single-molecule long read sequencing. *Nat Commun* **10**: 4660.

Kiguchi Y, Nishijima S, Kumar N, Hattori M, Suda W. 2021. Long-read metagenomics of multiple displacement amplified DNA of low-biomass human gut phageomes by SACRA pre-processing chimeric reads. *DNA Res* **28**: dsab019.

Koren S, Walenz BP, Berlin K, Miller JR, Bergman NH, Phillippy AM. 2017. Canu: scalable and accurate long-read assembly via adaptive k-mer weighting and repeat separation. *Genome Res* **27**: 722–736.

Lasken RS, Stockwell TB. 2007. Mechanism of chimera formation during the Multiple Displacement Amplification reaction. *BMC Biotechnol* **7**: 19.

Li H. 2018. Minimap2: pairwise alignment for nucleotide sequences. *Bioinformatics* **34**: 3094–3100.

Li H. 2023. seqtk. https://github.com/lh3/seqtk (Accessed June 18, 2024).

Li H, Durbin R. 2009. Fast and accurate short read alignment with Burrows-Wheeler transform. *Bioinformatics* **25**: 1754–1760.

Liao W-W, Asri M, Ebler J, Doerr D, Haukness M, Hickey G, Lu S, Lucas JK, Monlong J, Abel HJ, et al. 2023. A draft human pangenome reference. *Nature* **617**: 312–324.

Marçais G, Kingsford C. 2011. A fast, lock-free approach for efficient parallel counting of occurrences of k-mers. *Bioinformatics* **27**: 764–770.

Martin M, Patterson M, Garg S, Fischer SO, Pisanti N, Klau GW, Schöenhuth A, Marschall T. 2016. WhatsHap: fast and accurate read-based phasing. 085050. https://www.biorxiv.org/content/10.1101/085050v2 (Accessed July 25, 2023).

Quinlan AR, Hall IM. 2010. BEDTools: a flexible suite of utilities for comparing genomic features. *Bioinformatics* **26**: 841–842.

Treangen TJ, Sommer DD, Angly FE, Koren S, Pop M. 2011. Next generation sequence assembly with AMOS. *Curr Protoc Bioinformatics* **Chapter 11**: Unit 11.8.

Warris S, Schijlen E, van de Geest H, Vegesna R, Hesselink T, Te Lintel Hekkert B, Sanchez Perez G, Medvedev P, Makova KD, de Ridder D. 2018. Correcting palindromes in long reads after whole-genome amplification. *BMC Genomics* **19**: 798.

Zhou Y, Song L, Li H. 2024. Full resolution HLA and KIR gene annotations for human genome assemblies. *Genome Res* gr.278985.124.
