# Supplementary material for: Targeted and complete genomic sequencing of the major histocompatibility complex in haplotypic form of individual heterozygous samples
Source: HighWire-hosted journal article supplement (doi:10.1101/gr.278588.123), 2024-09-26
Supplement: Supplemental_Table_S3.xlsx [file Supplemental_Table_S3.xlsx]

## Sheet: RSE Oligos for MHC I and III
Supplemental Table S3: RSE Oligo Sequences targeting MHC I and III
Primer ID	PrimerChr	Primer Start	Primer End	Sequence	GC	Tm	Size	Self Dimer	Hairpin Tm	Hairpin dG
MHC-1	chr6	29656840	29656865	CTGTAAGTGATCCTGCCCCACTGAT	52	58.05	25	-3.547	-	-0.162
MHC-2	chr6	29664114	29664139	TGCTCAACCTACTCCACATCTCCAG	52	57.78	25	-2.199	-	2.373
MHC-3	chr6	29670186	29670211	TCTAGGACCCCAGGTTAAGGAACCA	52	58.05	25	-3.822	-	-1.312
MHC-4	chr6	29675267	29675292	TGGACAGAGGTACACTAGGAGAGCA	52	57.92	25	-3.721	-	0.654
MHC-5	chr6	29680793	29680818	AATCTTCCTTCTGGGATGCCGACTT	48	57.98	25	-3.571	-	-0.256
MHC-6	chr6	29687286	29687311	AGCAATCAGAAAAGGCTGGGATGTC	48	57.55	25	-3.202	-	0.385
MHC-7	chr6	29701980	29702005	CTGCTCAGGGCTGGACTTGGATATG	56	58.93	25	-3.076	-	-0.286
MHC-8	chr6	29708154	29708179	CTGATCTGGCAACACCTTCTTCAGC	52	58.1	25	-3.269	-	-0.188
MHC-9	chr6	29715530	29715555	GTAATTCTGCGGCCAAGACAGTGAC	52	58.4	25	-5.741	-	0.666
MHC-10	chr6	29721238	29721263	CAGACTCAACAGACACATGGAATGA	44	55.08	25	-4.105	-	-0.634
MHC-11	chr6	29729098	29729123	AAACATAAGCCATTGTGAGCCAGCA	44	57.72	25	-2.679	-	0.744
MHC-12	chr6	29733898	29733923	ACCATCACACCTAAGACAGCGAGAT	48	57.55	25	-2.919	-	1.554
MHC-13	chr6	29738171	29738196	GGACAGTTGGATCTCAGGTTTGTGC	52	58.04	25	-3.095	-	1.266
MHC-14	chr6	29744291	29744316	ATTCCCTCTGTGTCCCATGTAGCAG	52	58.05	25	-2.979	-	1.097
MHC-15	chr6	29750207	29750232	GTGACATCCCTCTTTCCAGTGTTGC	52	58.04	25	-2.032	-	1.376
MHC-16	chr6	29756038	29756063	CCACTTCCCCGCTCCTAAGTATCTC	56	57.96	25	-2.281	-	0.598
MHC-17	chr6	29761680	29761705	GGGGAAGGGGATGAGTCTTTCAAGT	52	57.91	25	-2.322	-	0.455
MHC-18	chr6	29768426	29768451	ATGCTCTGGTTAGGGGAAGCTATGG	52	57.86	25	-3.329	-	0.376
MHC-19	chr6	29773050	29773075	CCTGCATTGGCTCCATTTTGCTAGT	48	58.07	25	-2.975	-	-0.086
MHC-20	chr6	29778642	29778667	CACAATGATCGCTTTACTTGAACTT	36	52.79	25	-2.195	-	0.896
MHC-21	chr6	29786876	29786901	TAAGCACCCAAGGCTCTGTGATGTC	52	58.75	25	-5.104	-	0.096
MHC-22	chr6	29792432	29792457	CCAGGCTTCCACTCCTTGAGGTATT	52	57.98	25	-3.403	-	0.304
MHC-23	chr6	29800206	29800231	ATTCAGGGGCTACCAAGATTGTGCT	48	58.2	25	-2.248	-	-0.256
MHC-24	chr6	29810732	29810759	GCCTATTCCTATTCAGCACTGTCTTGC	48.15	57.93	27	-2.679	-	0.285
MHC-25	chr6	29819302	29819327	ACAATGCCACGGTATATGAGAAACA	40	54.87	25	-2.689	-	0.913
MHC-26	chr6	29827015	29827040	ACACGGAAACTTAGGGCTACGGAAT	48	58.01	25	-2.689	-	0.714
MHC-27	chr6	29831828	29831853	TCCTACTCTTCTTCCTGCCCTGAGT	52	58.14	25	-3.322	-	0.217
MHC-28	chr6	29835902	29835927	GTGCATAGTGAGGCCATTTCTGTGT	48	57.57	25	-6.179	-	0.924
MHC-29	chr6	29840095	29840120	TAGCTCCAGGGATGACCATTCACAC	52	58.06	25	-3.613	-	-0.406
MHC-30	chr6	29844640	29844664	TCTCTGATGTCACTCCTCAGCCAC	54.17	57.69	24	-2.258	-	0.528
MHC-31	chr6	29850629	29850654	CTGAGGGGTTTTGGGGAGGTAGAAT	52	57.67	25	-0.734	-	2.131
MHC-32	chr6	29855547	29855572	TTGGCTGGATTGGGATATGTGGAGG	52	58.32	25	-2.025	-	1.654
MHC-33	chr6	29861355	29861380	CACTCTGGCCCCATTTCAATCAAGG	52	58.07	25	-5.093	-	1.412
MHC-34	chr6	29866294	29866319	GACACTCCATCCAGTCATCAGGAGG	56	58.13	25	-4.691	-	-0.952
MHC-35	chr6	29874181	29874206	CTGCATTGGCTCCATTTTGCTGGTA	48	58.31	25	-2.975	-	-0.086
MHC-36	chr6	29886399	29886423	AACAGGTCATGGGACAGTGCTAGT	50	57.53	24	-3.197	-	-0.494
MHC-37	chr6	29891208	29891233	CTCCTTGGCCCTTCAGTAGAACCTT	52	57.92	25	-5.093	-	0.334
MHC-38	chr6	29905727	29905752	GGGAGATGCTGATGCTTGCTTATCC	52	57.81	25	-2.478	-	-0.086
MHC-39	chr6	29913382	29913407	TATGGCAGGTGGGGTGATAGAATGC	52	58.39	25	-3.054	-	0.705
MHC-40	chr6	29918487	29918512	AGCCATACAGAGGGTTTCCAGTTCC	52	58.22	25	-1.971	-	0.144
MHC-41	chr6	29926260	29926285	ATTCCCCATCTCCGCAGTTTCTCTT	48	57.98	25	-2.241	-	1.144
MHC-42	chr6	29931785	29931810	AGGGTCAGGAGTGAATGCTTTAGGA	48	57.15	25	-2.199	-	0.834
MHC-43	chr6	29936938	29936962	CCATGAAAACGGCCTTGGCTACAT	50	58	24	-5.804	-	-0.936
MHC-44	chr6	29942450	29942475	ATTGGGTGTCGGGTTTCCAGAGAAG	52	58.69	25	-1.869	-	0.384
MHC-45	chr6	29951494	29951519	AACAGTCTAGGGTGGCTTCATAGGT	48	56.92	25	-4.307	-	0.754
MHC-46	chr6	29957730	29957755	GGTCATGTCTCTTCTCACGGGAACT	52	58.02	25	-3.063	-	0.762
MHC-47	chr6	29951917	29951942	GCACCTTGTGTGCCATTCCTGATTA	48	57.79	25	-3.756	-	-1.643
MHC-48	chr6	29958006	29958031	CCAGATGGGAGTTGGCTTGTATCCT	52	58.04	25	-2.148	-	0.153
MHC-49	chr6	29965923	29965948	CTGGGGAAAAGTCTGCCAAAATGCT	48	58.18	25	-2.351	-	0.614
MHC-50	chr6	29971922	29971947	GGCTTCCTGATCTCACAACCCCTAA	52	57.99	25	-3.269	-	1.412
MHC-51	chr6	29977682	29977707	GAGCTTCTACCTCCAGATGTGCCAG	56	58.65	25	-2.997	-	1.454
MHC-52	chr6	29982268	29982293	CTGAAACAGGAAACAAGGGCCAAGT	48	57.84	25	-6.155	-	0.944
MHC-53	chr6	29989074	29989099	TTATTGAGTGTGAGGAAAGCTGCAC	44	55.84	25	-4.844	-	0.634
MHC-54	chr6	29995183	29995208	GTTCTACTCTTCCACGCTTGCCTTG	52	58.12	25	-1.999	-	1.684
MHC-55	chr6	30005764	30005789	TTAAAACACCACAAGCGGGAGTCAC	48	57.93	25	-2.778	-	0.364
MHC-56	chr6	30011901	30011926	CAATCACTCTCCTACTCCCACCACC	56	58.06	25	1.137	-	999.401
MHC-57	chr6	30016521	30016546	GGGAGGGGTCCTTGGAGTTCTTATG	56	58.04	25	-1.972	-	0.542
MHC-58	chr6	30024310	30024335	ATTCCAGGGGAGGTGTTTCTCTGAC	52	57.92	25	-2.56	-	0.566
MHC-59	chr6	30031924	30031949	GAAACACGGTAAAGGTCAGTCAGCC	52	58.06	25	-2.689	-	1.493
MHC-60	chr6	30036127	30036152	TACAGCGTCATATCCACCACCAGAT	48	57.36	25	-2.001	-	1.515
MHC-61	chr6	30042491	30042516	CTCTCTCCCTGCCTTTGGCTGTAAT	52	58.28	25	-4.664	-	-0.684
MHC-62	chr6	30053819	30053844	TGTCCAGCAGACAAGAAGGAACTGT	48	58.06	25	-4.355	-	-0.7
MHC-63	chr6	30059901	30059926	CAATTCACAGGGGATGTTGGCTGTT	48	57.95	25	-2.897	-	-0.162
MHC-64	chr6	30066262	30066287	TCCCTCAGATCCAAGCGGTACAAAA	48	57.94	25	-3.721	-	0.614
MHC-65	chr6	30072375	30072400	GCAAGATGGTGGATGACCAAGATGG	52	57.91	25	-3.238	-	-1.083
MHC-66	chr6	30077737	30077762	TGTGTTGTTGCACCTTCCAGTTTGT	44	57.96	25	-2.829	-	0.268
MHC-67	chr6	30086654	30086679	GTTCTCCAAGCCCTTAGCAGTTTCC	52	57.8	25	-2.679	-	-0.456
MHC-68	chr6	30092863	30092888	ATGATCTTACAGAACGGGCTGGACC	52	58.35	25	-4.419	-	0.096
MHC-69	chr6	30098642	30098667	TATGTTCTCGCTTTCCTGTGGGTGA	48	57.95	25	-1.609	-	0.514
MHC-70	chr6	30104450	30104475	GCTCCTTTTGTGGAGAAATGCTGGT	48	57.96	25	-4.566	-	-1.592
MHC-71	chr6	30108900	30108925	TGAATGCAGAGTTAGAGGTGGGTGG	52	58.23	25	-3.289	-	1.612
MHC-72	chr6	30115647	30115672	GGACCTGCCAAGACTAATGGGATGA	52	58.04	25	-2.351	-	0.176
MHC-73	chr6	30121793	30121818	CAGTTCTGAGTTTCCAGCTCTTCGC	52	58.13	25	-2.572	-	-0.132
MHC-74	chr6	30127971	30127996	TCCTGTTGGAAACCGACCCTATCTG	52	58	25	-3.155	-	-1.056
MHC-75	chr6	30133884	30133910	TGTCTCTTGACATTGCACTTACGGTT	42.31	57.07	26	-2.93	-	-0.544
MHC-76	chr6	30139772	30139797	CATACAGATGCCCACACCTGAGAAG	52	57.18	25	-3.406	-	0.016
MHC-77	chr6	30145515	30145540	CCTGGGCTATGAGTTTGCACCTAGT	52	58.28	25	-2.829	-	0.464
MHC-78	chr6	30151131	30151156	TCCAGTCTTCACGCTTCTTTGGACT	48	58.13	25	-2.666	-	0.436
MHC-79	chr6	30155702	30155727	CCCATCCTGACATAGGCTCCTTACC	56	57.94	25	-3.378	-	-0.104
MHC-80	chr6	30161387	30161412	TACACTGCACCAGCAACTTCAATGG	48	57.98	25	-2.829	-	-0.486
MHC-81	chr6	30167831	30167856	AAGCAACCTATCCACCATCCCTCAG	52	58.04	25	-2.679	-	1.364
MHC-82	chr6	30174217	30174242	TGAGCAGAGCCATCCTTATCTGACC	52	57.89	25	-3.361	-	-0.602
MHC-83	chr6	30182726	30182752	TGGCTCTTTCTGTTCTCCCATAACCA	46.15	57.72	26	-2.025	-	1.414
MHC-84	chr6	30188803	30188828	ATATGGCCTCTGGTCTTAGGTTGCC	52	58.1	25	-5.699	-	0.165
MHC-85	chr6	30195887	30195912	AGATGTGGTGCCATTTCAGCTTCAC	48	58.03	25	-4.355	-	0.814
MHC-86	chr6	30202007	30202032	AAGCCCTTTATCATGCCTCTTTGCC	48	57.83	25	-2.507	-	0.824
MHC-87	chr6	30208311	30208336	TCATCGTATCCAAGGTTTCGCTCCA	48	58.07	25	-1.727	-	0.844
MHC-88	chr6	30214807	30214832	TCTCAGCACCTACCTAGACCCTCTT	52	57.67	25	-3.227	-	0.754
MHC-89	chr6	30219617	30219642	GCCATAGCAGAACCACCTTGATGTC	52	57.93	25	-2.679	-	0.153
MHC-90	chr6	30226106	30226131	AGATTTCTGGGCAACACTCCACTCT	48	57.86	25	-2.655	-	0.914
MHC-91	chr6	30231934	30231962	TGCTGGTCTGTGTAATGACTTCTAACTG	42.86	56.93	28	-2.528	-	0.606
MHC-92	chr6	30238334	30238359	GAGAGACCCAGTGACCATTGACTGT	52	57.95	25	-3.245	-	0.228
MHC-93	chr6	30244494	30244519	GCAAACACTTCTATGGCTCACAGGG	52	58.1	25	-2.025	-	0.913
MHC-94	chr6	30259188	30259213	GAAGTCCAGTTCAGGGACGAGGATT	52	58.01	25	-3.981	-	-0.563
MHC-95	chr6	30265678	30265703	GCCAGATGGAAGATTGAGAAGTGGC	52	57.92	25	-4.382	-	-0.296
MHC-96	chr6	30272596	30272621	TGATTTGGGCTTACAACAGGATGGC	48	57.78	25	-2.025	-	0.384
MHC-97	chr6	30289034	30289059	CATGTCCAAGCACAGGCAGTTGTAA	48	57.98	25	-2.679	-	-0.356
MHC-98	chr6	30295094	30295119	TCAGGCATCCAGGCATCACAATTTC	48	57.85	25	-2.655	-	0.164
MHC-99	chr6	30301881	30301906	CCTCCCGGCTACTTTGTGGTAGATT	52	58.06	25	-4.507	-	-0.472
MHC-100	chr6	30308048	30308073	CCAGGGAATGCAAGTCTGGGTAGAT	52	58.04	25	-5.427	-	-0.213
MHC-101	chr6	30315964	30315989	AGACTTCCTCAGTGTTCCTGCTCTG	52	57.96	25	-2.199	-	0.186
MHC-102	chr6	30322130	30322155	CCTTACTGAAGTTGACCATGAGGTT	44	54.74	25	-3.895	-	-0.614
MHC-103	chr6	30327726	30327751	GAGGAAGGGGTAGGATCACCACAAG	56	58.05	25	-3.725	-	-0.056
MHC-104	chr6	30334093	30334118	GCAGCAAGTGGCCCTAAACTAGAAG	52	57.87	25	-5.093	-	-0.046
MHC-105	chr6	30339977	30340002	GAGGAGGGGTACAGTCAGGAGTTTG	56	58.01	25	-3.721	-	1.594
MHC-106	chr6	30345729	30345754	AAGTTCCTAACGCCACTTGCACAAA	44	57.86	25	-2.829	-	-0.116
MHC-107	chr6	30351414	30351439	CACCCACTATGACCCCATCTCTGAC	56	58.12	25	-1.846	-	0.646
MHC-108	chr6	30357023	30357048	ATCGGTCCTTCCTAAAACCCCAGTG	52	58.22	25	-1.781	-	0.384
MHC-109	chr6	30363349	30363374	TCCTTCAGGGTGACAGAGGGTCATA	52	58.13	25	-3.158	-	-0.744
MHC-110	chr6	30369831	30369856	CTAGCTGGATCAGTGGGCTTCTAGG	56	57.96	25	-4.371	-	0.056
MHC-111	chr6	30375881	30375906	CACTGGTCTCCCCTCACTTATGGAC	56	58.06	25	-1.904	-	0.414
MHC-112	chr6	30381940	30381965	CAACCTGCATACAACACAGGCAGAA	48	57.98	25	-5.183	-	-1.542
MHC-113	chr6	30389917	30389942	CAGGAAAACAAGGACAGGAGACGTG	52	57.77	25	-4.067	-	1.674
MHC-114	chr6	30395892	30395917	ACACATCAGTTGGCTGGATGAAGGA	48	58.16	25	-4.307	-	-0.742
MHC-115	chr6	30400805	30400830	CAACAGGGTGGTGAAGCACTATGAG	52	57.59	25	-3.227	-	-0.097
MHC-116	chr6	30404966	30404988	GGACAGAGGGTCGTGTGCTCAG	63.64	58.92	22	-2.664	-	-0.045
MHC-117	chr6	30415294	30415319	CCCGGCATTTCTACTATGATGGGGA	52	57.93	25	-4.507	-	-0.136
MHC-118	chr6	30424588	30424614	TCTTAGTGCCCAGTTGAAACCTCAAT	42.31	56.51	26	-1.593	-	0.526
MHC-119	chr6	30438790	30438815	TTTTGGGGTTGGGGTAGACAAGGAA	48	57.95	25	-1.313	-	1.564
MHC-120	chr6	30444351	30444376	GGGTTTACATTGCATCACCGTCTGT	48	57.81	25	-2.829	-	1.215
MHC-121	chr6	30450849	30450874	GACCAAGTAGGCTCTAACCACGGAA	52	58.02	25	-3.378	-	-0.046
MHC-122	chr6	30457199	30457224	TGACTCTCCAAATGTCCCCACTTGT	48	57.8	25	-2.312	-	0.766
MHC-123	chr6	30463344	30463369	TGACAACCTCGTTCAGTCTCCTCTG	52	57.98	25	-2.855	-	0.556
MHC-124	chr6	30470252	30470277	CTGAAAACCCAGTGATGGCTGAAGG	52	58.03	25	-3.251	-	-1.214
MHC-125	chr6	30480664	30480689	ACTGGTGGGAAGTGGTCAGGAGATA	52	58.36	25	-2.665	-	0.596
MHC-126	chr6	30484673	30484698	TCCAATTCCTCAGCTTCCACTACCC	52	57.99	25	-2.481	-	1.554
MHC-127	chr6	30490903	30490928	GCCAGGACCAGAAATCCCTTTTCAC	52	58.02	25	-3.212	-	-0.432
MHC-128	chr6	30496824	30496849	AAGGAGGAACCCGAGTGATCTTGTC	52	58.01	25	-3.269	-	0.254
MHC-129	chr6	30502424	30502449	TATCTCCGTTCACTCCACCACAAAA	44	56.17	25	-1.563	-	2.084
MHC-130	chr6	30497928	30497953	GTACTGTTCATACCCAGCAGAGGCT	52	58.06	25	-3.167	-	-0.435
MHC-131	chr6	30502955	30502981	TGGTACAATTCCCTAATGCTCTTGGC	46.15	57.2	26	-3.721	-	0.063
MHC-132	chr6	30507904	30507929	GAATAACCTGTGCCTCAAGCTGCAA	48	58.03	25	-4.844	-	-0.186
MHC-133	chr6	30515282	30515307	CGTAGTTCTTCACAGAGGGCTCCAT	52	58.08	25	-2.392	-	0.844
MHC-134	chr6	30519448	30519473	GTTTTAGAGTGCAGTGGGGATCACG	52	57.89	25	-3.725	-	-0.115
MHC-135	chr6	30528315	30528340	CCTGAGAAGTGGGGACTAATCGCAT	52	58.12	25	-2.241	-	0.334
MHC-136	chr6	30533633	30533657	TATCTCATAGACGTGATTGGCGGC	50	56.74	24	-4.067	-	-0.334
MHC-137	chr6	30541648	30541673	TTCTCAAATGCAGCGGGAAGTCCAT	48	58.98	25	-3.772	-	-0.036
MHC-138	chr6	30547566	30547591	TCTACTCTGTGATGGGACTTGGTGC	52	58.01	25	-1.258	-	1.482
MHC-139	chr6	30553521	30553546	CACATACTCATAAAGTGCTGGCGGG	52	58	25	-2.731	-	-0.054
MHC-140	chr6	30558250	30558275	AGAGAAGACAGCAAGGGAGGGGATA	52	58.18	25	-2.679	-	998.461
MHC-141	chr6	30563881	30563906	GCATCAACCAGAACAAGCTGCCTTA	48	58.03	25	-3.608	-	0.746
MHC-142	chr6	30570957	30570982	TTCCTCTCGTGTCTTCCTTGCCTAC	52	58.02	25	-1.647	-	2.363
MHC-143	chr6	30578571	30578596	AATAAGGTGACAGTGGTGGCTCGAT	48	58	25	-3.158	-	0.774
MHC-144	chr6	30585188	30585213	AGTTTTCTCTGGGGTTGTCTGAGCA	48	58.04	25	-2.679	-	1.136
MHC-145	chr6	30590063	30590088	CAGCTCACAAACTGGCACATCTTGA	48	57.98	25	-2.655	-	0.313
MHC-146	chr6	30595640	30595665	ATTGAAGATAGACCCCGTTGCACCT	48	57.99	25	-2.829	-	1.782
MHC-147	chr6	30601203	30601228	TCGCCAGGATAACCAGCTTTAGGTT	48	57.99	25	-4.213	-	-0.443
MHC-148	chr6	30606711	30606736	AGCACCTAAAGGCCACATCCCAATA	48	57.96	25	-6.179	-	0.154
MHC-149	chr6	30613040	30613065	CTCCACCTCATCCTAAGCTATGCGT	52	57.96	25	-3.329	-	1.193
MHC-150	chr6	30617362	30617387	CCCAAATGACAACTCGCCAACTGAT	48	58.03	25	-1.191	-	1.354
MHC-151	chr6	30622969	30622994	AGGTATTTGTTCAGTGGCTCCTGCT	48	58.16	25	-2.25	-	-0.036
MHC-152	chr6	30628282	30628307	GCTTTCCCCATACTTCCTCCTACCC	56	58.1	25	-0.975	-	3.302
MHC-153	chr6	30633937	30633962	GGCCAGTGAGGATGATTAGACAGCA	52	58.35	25	-5.105	-	-0.496
MHC-154	chr6	30640400	30640425	GGCTTCTTTGCCCATCAACATCGTA	48	57.87	25	-3.034	-	-0.435
MHC-155	chr6	30646838	30646863	GACTCATTATTTCAGCCGCCTCACC	52	58	25	-1.761	-	1.744
MHC-156	chr6	30653210	30653235	GCTGGTGTCAGGTTCTGTTTACGTC	52	58.07	25	-3.931	-	-0.164
MHC-157	chr6	30659218	30659243	CCCACCTCTTAGCACATCAAGGACT	52	57.99	25	-2.679	-	0.026
MHC-158	chr6	30665117	30665142	CCTCCTCCAGCACCAGTTGATACTT	52	57.99	25	-2.679	-	0.594
MHC-159	chr6	30671071	30671096	TCCTCTTCTTCCTCACGCTTCTTCC	52	58.02	25	-1.999	-	999.481
MHC-160	chr6	30677068	30677093	CACACCAGGGACTTTGGATTAGGGT	52	58.15	25	-2.88	-	-0.344
MHC-161	chr6	30683199	30683224	TGGGATGAGAATGAGACTGGGCTTC	52	58.05	25	-2.025	-	0.534
MHC-162	chr6	30689693	30689718	CAAAGTAGTAGCCTGTGCCAACCAC	52	58.05	25	-1.655	-	0.055
MHC-163	chr6	30693834	30693859	GCTTTGAGTTGTGCAAGGGGACTAA	48	57.68	25	-2.829	-	-0.136
MHC-164	chr6	30699917	30699942	TAAAGATGCTTCCAGAGGCCAGGAG	52	58.05	25	-6.179	-	0.644
MHC-165	chr6	30705728	30705753	TATTTGTCCTGCTCCTAGTGGCCTG	52	58.06	25	-5.699	-	0.634
MHC-166	chr6	30711560	30711585	TCCTGGTCTCCTACCCTACCCATAC	56	57.78	25	-2.94	-	-0.374
MHC-167	chr6	30717960	30717985	GAGGGGCGAGGGAAGGATCATAAAA	52	58.1	25	-3.725	-	0.804
MHC-168	chr6	30722821	30722846	TGACAAGTCTCTGATCCCTGCTGTC	52	58.02	25	-3.502	-	0.754
MHC-169	chr6	30729935	30729960	CCTGGATGCTGGTTAAATGCTAGGC	52	57.97	25	-2.883	-	0.714
MHC-170	chr6	30734267	30734292	TTCTGCTCCCAATAAGTCATGCCAC	48	57.33	25	-2.507	-	1.224
MHC-171	chr6	30740306	30740331	CTTCCTGTCCAAGCAGAGATCAGGT	52	58	25	-3.827	-	-0.432
MHC-172	chr6	30747748	30747773	TGATGCTCTGGACGGGTAGAGACTA	52	58.05	25	-4.001	-	-0.332
MHC-173	chr6	30754057	30754082	CCTATCTCTGACCCTGAGCCTTTCA	52	57.29	25	-1.902	-	0.754
MHC-174	chr6	30761374	30761399	GTCCTGGCTACCTGCTGAAATGAGT	52	58.52	25	-2.384	-	-0.236
MHC-175	chr6	30767407	30767432	GGAAGAGTTTCACAGCAGGACAGAG	52	57.31	25	-2.679	-	0.346
MHC-176	chr6	30773203	30773228	CTGTGGTGCCAGATGGTATGAGAGT	52	58.06	25	-4.169	-	0.274
MHC-177	chr6	30781889	30781914	GAAGGCTAGGCCACTTTCCACTACT	52	58	25	-6.179	-	-0.954
MHC-178	chr6	30791206	30791231	ACACTGGAATGTGTGTGCAATGGAG	48	57.97	25	-3.247	-	-0.483
MHC-179	chr6	30797012	30797037	ACATCATTCTGGGTGGCTGAATCCT	48	57.97	25	-2.025	-	1.014
MHC-180	chr6	30804457	30804482	CCACAGGGAGGTGTTGAAAGAAAGG	52	57.68	25	-2.698	-	0.353
MHC-181	chr6	30809774	30809799	CCAAGCCTGCTACCTCATTTGCATT	48	58.07	25	-3.223	-	0.414
MHC-182	chr6	30814471	30814496	TGATGGGGCTTTTAGGGAAACAACG	48	57.73	25	-2.025	-	1.204
MHC-183	chr6	30820782	30820807	ACTATACTCAGCTCTTCTCGGGGCT	52	58.33	25	-2.475	-	0.365
MHC-184	chr6	30828228	30828253	GACTGCATAGTAAGTGGTGCCTCCT	52	58.06	25	-3.539	-	0.114
MHC-185	chr6	30835188	30835213	GCTAAGAGAGGCAGAAGTGGACTGT	52	58.01	25	-3.167	-	0.526
MHC-186	chr6	30841576	30841601	CTTAGAGGACAAGTGGGTAGGGCAC	56	58.3	25	-2.655	-	0.685
MHC-187	chr6	30847663	30847688	ATCTGCCCTCCCTCATCTCTAACCT	52	58	25	-1.593	-	2.512
MHC-188	chr6	30853938	30853962	GAGTCTGAGGGCTGACCATCTGTG	58.33	58.53	24	-2.252	-	-0.256
MHC-189	chr6	30858311	30858336	CTCCTGGTGAGAATGGAGGTGTGTA	52	57.48	25	-3.449	-	-0.263
MHC-190	chr6	30862451	30862476	GTTCTTTTCTTGCCGATGTGAGGCT	48	58.04	25	-3.337	-	-0.884
MHC-191	chr6	30857413	30857438	TGGAGGCAGGACTGGACTAAATGTG	52	58.23	25	-3.43	-	0.574
MHC-192	chr6	30864536	30864561	TTGTGTGGTGGTGCAGATTGTGTTT	44	58.02	25	-2.829	-	1.064
MHC-193	chr6	30868755	30868780	CCGGGAACAACATAGGGTTCAGCTA	52	58.29	25	-4.185	-	-0.352
MHC-194	chr6	30872926	30872951	TGGGGTATGCTTTTCACCGTTAGTG	48	57.29	25	-2.199	-	-0.115
MHC-195	chr6	30877753	30877778	TTTCTGACCTCTCTCTTGGGTCTGC	52	57.95	25	-4.278	-	-0.942
MHC-196	chr6	30883436	30883461	AGCTCTCTCAGTTGCTTTGCCTACT	48	57.94	25	-2.199	-	0.495
MHC-197	chr6	30890741	30890766	GAGCCTGAAGTCTGAGGATGGAACA	52	58	25	-2.898	-	0.113
MHC-198	chr6	30895644	30895669	AAGCTCTTGTGCCCTTAGCTCATCT	48	57.99	25	-3.613	-	-0.186
MHC-199	chr6	30902024	30902047	TCTTTCAAGCAGAAACACCTGGA	43.48	54.39	23	-4.766	-	0.076
MHC-200	chr6	30907271	30907296	GGAAACGTGTAGTTCTGGGTTTGGG	52	57.98	25	-3.755	-	0.236
MHC-201	chr6	30913640	30913665	ATGAACCCCTGAGCAGACAAGCATA	48	57.98	25	-3.774	-	0.044
MHC-202	chr6	30919739	30919764	CCTCTCCCTTCCCTTCAGCATCTAC	56	57.89	25	-2.679	-	1.792
MHC-203	chr6	30925995	30926020	GAGGCAACAAAAGGTAAGGCTGAGG	52	58.03	25	-3.202	-	0.704
MHC-204	chr6	30933368	30933393	GACGAGCAGGAGGTAGAATTGGGAA	52	58.07	25	-3.473	-	1.594
MHC-205	chr6	30939105	30939130	CCAGGTTTCTCCATCCCAGACATCA	52	57.98	25	-1.727	-	-0.156
MHC-206	chr6	30947216	30947241	TCAGGTAATGGGATTGGGACAGTGG	52	57.98	25	-3.158	-	0.412
MHC-207	chr6	30951963	30951988	CAGAACACCCAGAAAAGACCACGTC	52	58	25	-2.793	-	0.933
MHC-208	chr6	30957810	30957835	ATAAAGCCCCTTCGCTTCCACTGTA	48	57.99	25	-2.781	-	-0.302
MHC-209	chr6	30964689	30964714	CACCAAAACACCTACTGACACCACC	52	57.93	25	-0.965	-	0.454
MHC-210	chr6	30972005	30972030	CACCTCTATTCTGGTGACTGGTGCT	52	58	25	-4.173	-	-1.053
MHC-211	chr6	30978090	30978115	AACACATGGCTTTGGACATGGAGTG	48	57.96	25	-4.479	-	-0.512
MHC-212	chr6	30982754	30982779	ATTTGGGTCTCTTCAGTCACGCTCT	48	57.95	25	-1.999	-	1.244
MHC-213	chr6	30988725	30988750	ACATGAAGAGCCAAGAGCAGGATGA	48	57.99	25	-4.889	-	-0.456
MHC-214	chr6	30994014	30994039	GAGGAAGAAAATGGGAGCCCCTACA	52	57.98	25	-4.656	-	-0.284
MHC-215	chr6	30998768	30998793	AATTGAGACGACTGCTTTGCTTGCT	44	57.98	25	-3.473	-	0.714
MHC-216	chr6	31004531	31004556	CCCAGCTTTCGTCATGGAATACACC	52	57.93	25	-3.197	-	-0.004
MHC-217	chr6	31010049	31010074	TGCTCTTATCACCCTCCAAATCCCC	52	58.03	25	-2.199	-	2.512
MHC-218	chr6	31014846	31014871	TGATACAGTCAGTCAAAGTGCAGCC	48	57.3	25	-2.829	-	0.694
MHC-219	chr6	31019905	31019930	CTTGTGAGGGTGAGAGGGAGTATGG	56	57.83	25	-0.555	-	1.693
MHC-220	chr6	31025832	31025857	CTCTGGGACCACAACAACCTTTACT	48	56.62	25	-3.188	-	1.064
MHC-221	chr6	31031988	31032013	CCTCCTTCTCTGTATGACACCCACC	56	58.06	25	-1.208	-	1.212
MHC-222	chr6	31038289	31038314	GCAGACGGAGCCTAGAGATGAACTT	52	58.14	25	-3.227	-	0.844
MHC-223	chr6	31043892	31043917	AGGGCTTGGTTGTTAATGGGATGGA	48	58.13	25	-2.025	-	1.902
MHC-224	chr6	31049143	31049169	TCCTATTCAGTGTGATTCCCTCCTGC	50	57.91	26	-2.116	-	1.142
MHC-225	chr6	31055553	31055578	TGCCCTCAGTCCAACTAGATCACAC	52	58.01	25	-4.221	-	0.854
MHC-226	chr6	31062609	31062634	AGCTGAGAAGTCTGTGTGCTTGAGT	48	58.13	25	-2.799	-	0.134
MHC-227	chr6	31069020	31069045	TCCTGATGAAATGTCTGGTAGCCCC	52	58.04	25	-1.649	-	0.611
MHC-228	chr6	31076938	31076963	AGATTTCTGGGCTGTCTCATCTCCG	52	58.13	25	-2.025	-	1.283
MHC-229	chr6	31082610	31082637	TCTAGGAAGAGAGAATTAGGGGTTGGT	44.44	56.2	27	-2.529	-	0.804
MHC-230	chr6	31086875	31086900	ATACCCGAGACCCACATTCAGGAAG	52	57.82	25	-2.479	-	0.464
MHC-231	chr6	31092130	31092155	CCATAAAGGCCACCCTCTTCTGCAT	52	58.79	25	-6.179	-	0.156
MHC-232	chr6	31107240	31107265	CAAGTGTAACTCCCAGTGCAAAGCA	48	57.92	25	-2.829	-	0.206
MHC-233	chr6	31112177	31112202	GATGTTCAGAGTTAGAGGGGCCAGT	52	57.76	25	-6.155	-	1.651
MHC-234	chr6	31118523	31118548	TCATCTGACTTCTGCTGCCTTGACT	48	57.94	25	-3.758	-	1.342
MHC-235	chr6	31123285	31123310	TCTAATCCGCCGTGCTTTTGGTTTT	44	57.97	25	-2.199	-	1.074
MHC-236	chr6	31129532	31129557	CCCTTCTCTTTCCCACTCACCTACC	56	58	25	1.445	-	999.491
MHC-237	chr6	31134706	31134731	TCCCTAACCCTGGTCGGATACTTGA	52	58.2	25	-2.933	-	0.104
MHC-238	chr6	31140886	31140911	CTCAATTATGCCCTCCTGGGGAAGT	52	58.03	25	-3.786	-	-1.894
MHC-239	chr6	31148208	31148233	TCAGGTATGAATGCAGAAGGGGCTT	48	57.97	25	-3.289	-	0.634
MHC-240	chr6	31155018	31155043	ACCTAAAGTCTGGCTGAGATCGTGG	52	58.08	25	-2.045	-	0.804
MHC-241	chr6	31162757	31162782	GTAGACACAGCAGCGAGCAAATAGG	52	58.02	25	-3.913	-	-0.656
MHC-242	chr6	31167878	31167903	GTGGCTAGGTAGATCCTGTTGCAGA	52	57.84	25	-2.883	-	-0.854
MHC-243	chr6	31172131	31172156	TCACACAGAATCCCCTTCAGAGACG	52	58.02	25	-1.869	-	0.326
MHC-244	chr6	31177933	31177958	TCCAACAGGAGTCTTACCTGGGAGA	52	58.07	25	-5.261	-	-1.302
MHC-245	chr6	31187962	31187987	TTCCTTTGGCCTAGTTTGAGTGCCC	52	59.14	25	-5.699	-	-0.274
MHC-246	chr6	31193667	31193692	ACACTTCTGCCTCATAGTGCTCTCC	52	58.07	25	-3.398	-	0.008
MHC-247	chr6	31199631	31199656	TCTGGCTAATCAACTGAGCGACTGT	48	58.02	25	-2.919	-	0.575
MHC-248	chr6	31214491	31214516	ACTTCAATAGCCTTAGCCCCGTCTC	52	58.12	25	-1.563	-	0.254
MHC-249	chr6	31222723	31222748	TCTATCTGCTCCCCAGAGGCTTGTA	52	58.25	25	-2.762	-	-0.583
MHC-250	chr6	31228495	31228518	GCCATGCCTTTGGATTAGGGCAA	52.17	57.88	23	-4.403	-	-1.383
MHC-251	chr6	31236282	31236310	ACCCCTGTTTATCTCTGTTATCTCTGGG	46.43	57.37	28	-3.045	-	0.715
MHC-252	chr6	31242595	31242620	TTAGAGCTTTGACTCCGCATCTGCT	48	58.3	25	-3.56	-	0.084
MHC-253	chr6	31251124	31251147	GGACAAAGGCTAATTTCCTCAGA	43.48	52.47	23	-3.094	-	0.856
MHC-254	chr6	31260690	31260717	CTTCTCACTGTTATGATTCTTCTGGTA	37.04	52.76	27	-0.737	-	1.134
MHC-255	chr6	31266375	31266399	CAGCATTCGGAGGTGTTCCTTGTG	54.17	58.26	24	-2.679	-	-0.354
MHC-256	chr6	31272225	31272250	AGGTTGGGAGAAGTGAAACTCAGGG	52	58.1	25	-3.321	-	0.206
MHC-257	chr6	31277638	31277663	GCCAACATGCTACCCTAAAGCTGAG	52	57.93	25	-3.437	-	0.076
MHC-258	chr6	31283592	31283617	GAGGATTCAGGGAGATCGAGATGGG	56	57.78	25	-2.943	-	1.142
MHC-259	chr6	31288891	31288916	CACTGGTAATCCCTTCAGGCAGAGT	52	57.99	25	-3.234	-	0.016
MHC-260	chr6	31294589	31294614	GGTGAGCATAGCAGATGCCAATCAG	52	58.05	25	-6.169	-	-1.292
MHC-261	chr6	31300169	31300194	TTCAAAGGAAAAGCGGCCATCTGAG	48	58.03	25	-5.741	-	0.944
MHC-262	chr6	31306181	31306206	AACCAGCTCTCCCCAACACTTATCC	52	58.22	25	-2.475	-	1.892
MHC-263	chr6	31312347	31312372	CCGGGAGATGTGGTTAGGAGATGTT	52	57.82	25	-4.185	-	1.353
MHC-264	chr6	31318840	31318865	TAATGAACCATGCTGTTTGGGCAGC	48	58.54	25	-4.367	-	-1.631
MHC-265	chr6	31342359	31342382	AGATCACAGGCTAATTTCCTCAG	43.48	52.03	23	-3.749	-	0.946
MHC-266	chr6	31349537	31349561	TCATTCAGCCACTCTTCGTGCCTA	50	57.93	24	-1.897	-	0.086
MHC-267	chr6	31354784	31354809	CAGGATCAGGAAACACGAGGAAAGC	52	57.88	25	-3.725	-	2.263
MHC-268	chr6	31359223	31359248	CCCAGTAGAGAAACCCAGAATGCAA	48	56.74	25	-3.281	-	1.034
MHC-269	chr6	31367184	31367209	AAAGCAAAAGAAGCGTGAGGTTGGT	44	58.08	25	-2.679	-	0.993
MHC-270	chr6	31373581	31373602	ATCTGCCCATCTGTCTTTTCC	47.62	52.09	21	-1.593	-	2.572
MHC-271	chr6	31379938	31379963	CCCACAGCACATTCTTGAGTCTTGG	52	58.04	25	-2.679	-	0.454
MHC-272	chr6	31387418	31387443	GCAGATAGCCCTGATTTTCCACAGT	48	57.1	25	-3.129	-	-0.044
MHC-273	chr6	31397341	31397366	CTGTGTCCCCACTCATTTGCGTTTT	48	58.43	25	-2.47	-	-0.094
MHC-274	chr6	31401443	31401468	GGCTGACAAAGAAGAAACGGACACA	48	57.94	25	-2.689	-	0.464
MHC-275	chr6	31409928	31409953	GGCCTTGTCATGCTACTCTTCCACT	52	58.52	25	-4.475	-	0.964
MHC-276	chr6	31416154	31416179	GCCCCATCACACTCTTACGCATTAC	52	58	25	-2.241	-	1.753
MHC-277	chr6	31421317	31421342	AAAGGAGAGGGTTCATTCAGGGGAC	52	57.91	25	-0.436	-	0.984
MHC-278	chr6	31437858	31437882	CTAGATAATTGAGTTGGGTGGCCC	50	55.01	24	-5.093	-	0.065
MHC-279	chr6	31442976	31443001	CCTTCATTCTCCTCCAGCTACCCAA	52	57.75	25	-3.125	-	1.694
MHC-280	chr6	31449430	31449455	AGATCAGAGTTCAGGCTTGGCACAT	48	58.22	25	-3.749	-	0.412
MHC-281	chr6	31458668	31458694	TAGGGAGAGTTTGTTGATGATTGGTT	38.46	54.38	26	0.067	-	2.072
MHC-282	chr6	31462878	31462903	GGGAGACATTGAGACAGAGCGTTTG	52	57.89	25	-2.315	-	0.884
MHC-283	chr6	31445360	31445385	CCCTTCATCCTCTCTGTCTCCCAAG	56	57.83	25	-0.429	-	1.612
MHC-284	chr6	31449430	31449455	AGATCAGAGTTCAGGCTTGGCACAT	48	58.22	25	-3.749	-	0.412
MHC-285	chr6	31459760	31459785	TAAGTAGACACTGAGGCTGTAGCAA	44	55.25	25	-4.199	-	-0.436
MHC-286	chr6	31468768	31468792	CTTTCTCTGTCCCCAACCAACGTG	54.17	57.91	24	-3.755	-	1.124
MHC-287	chr6	31475031	31475056	GTATCATCCCATCCACCAGTGCCTT	52	58.33	25	-2.079	-	0.984
MHC-288	chr6	31480760	31480785	CGAATCCAAGACCACCGATCCATTG	52	58	25	-2.479	-	1.323
MHC-289	chr6	31486389	31486414	CCTGCTGAGATTAGTCGAGGAAGGT	52	57.61	25	-2.565	-	1.015
MHC-290	chr6	31493845	31493870	TCCTTTCACCACTCTCTGCACTTGA	48	57.83	25	-2.829	-	1.584
MHC-291	chr6	31499360	31499385	TTCCTGTGTGCTGTTCTCTGATCCA	48	57.88	25	-2.663	-	2.342
MHC-292	chr6	31505484	31505509	TTCGTTCTTGTCCTTTTGCCCATGC	48	58.72	25	-2.423	-	0.463
MHC-293	chr6	31511142	31511167	TATTTCATGCGTCTGGGAGCGGATA	48	57.96	25	-2.507	-	0.539
MHC-294	chr6	31517292	31517317	GTGAGAGCCATTTATGTGCCTGTGT	48	57.57	25	-1.593	-	1.084
MHC-295	chr6	31523168	31523193	TGCTGGCCTTAATCTCCTCTTGTCC	52	58.28	25	-5.699	-	1.314
MHC-296	chr6	31528540	31528565	GTCCACAACAAGCATAGGGAGATGC	52	57.93	25	-3.294	-	-0.453
MHC-297	chr6	31534864	31534889	GGAAGGGGAGGATTCATTTGTGCTG	52	57.84	25	-2.199	-	1.004
MHC-298	chr6	31540505	31540530	CTCATTGTCCACATCGTTCTCTGCC	52	57.95	25	-1.647	-	1.412
MHC-299	chr6	31547722	31547747	AGGAAGAAGCCTCCACATCTGTCTG	52	58	25	-2.186	-	0.486
MHC-300	chr6	31553603	31553628	CTGTGGTAGGAATGGGGTTGTGTAT	48	56.25	25	-0.342	-	0.982
MHC-301	chr6	31559936	31559961	ATGGGTGGGCATGAGATCCTTGAAT	48	58.01	25	-4.335	-	1.075
MHC-302	chr6	31565076	31565101	GGAGGAGTTTATCAGTGGTCTGGGG	56	58.05	25	-2.25	-	-0.124
MHC-303	chr6	31571781	31571806	GGACCTTCTTGATGTGAAACCTGCC	52	58.03	25	-1.788	-	0.874
MHC-304	chr6	31578271	31578296	GGGAGTTGTGTCTGTAATCGCCCTA	52	58.07	25	-3.261	-	0.755
MHC-305	chr6	31583604	31583629	GCTCCAATCATCTCCCCTTCTTGGT	52	58.27	25	-2.552	-	0.374
MHC-306	chr6	31592833	31592858	TTCCTATGACACACGGGACTCACAC	52	58.26	25	-2.689	-	0.844
MHC-307	chr6	31598609	31598634	CTAAGCTACCGGAACAACCACACAT	48	57.07	25	-6.973	-	-0.016
MHC-308	chr6	31604123	31604148	CTCAAACGCCACATCTCTACACACC	52	57.9	25	-1.999	-	999.181
MHC-309	chr6	31611868	31611893	AAAGACCCTCTAGCCAGTGCTTACC	52	58	25	-2.606	-	-0.644
MHC-310	chr6	31619677	31619702	GTGCATTATCTCCAGCGCCTTCAAA	48	58.16	25	-5.815	-	0.887
MHC-311	chr6	31626136	31626161	TCAGGAGAATGATGATGGTTGGGCA	48	57.97	25	-2.655	-	1.134
MHC-312	chr6	31632599	31632624	GTCAAACCAGAACTCAGACCAAGCC	52	57.99	25	-1.94	-	1.405
MHC-313	chr6	31636672	31636697	CCCTGGTTTTCTGACATTCCTCCCT	52	58.15	25	-2.856	-	1.264
MHC-314	chr6	31642792	31642817	CAGGAAGATGAGGTGAATGGCAAGC	52	58.15	25	-3.046	-	1.412
MHC-315	chr6	31649022	31649047	TCCAATTCATTCCCTGGAGCCCTAC	52	58.03	25	-3.772	-	0.236
MHC-316	chr6	31654338	31654363	TAACTAAATCGCAAGCCTCAGCCCT	48	58.29	25	-2.241	-	0.254
MHC-317	chr6	31660625	31660650	GAGATCCCCAGTTACGAAGCAAAGC	52	57.94	25	-3.473	-	1.193
MHC-318	chr6	31666481	31666506	GTATTGGTAGGGAGCCTGAGTCGAG	56	57.97	25	-2.817	-	0.246
MHC-319	chr6	31672838	31672863	CCTTCCCCATCATCTGAGTGTTCCA	52	57.98	25	-0.736	-	0.794
MHC-320	chr6	31679076	31679101	CCATGACAGGAGAAGGCCACTTACT	52	57.99	25	-6.179	-	0.196
MHC-321	chr6	31685181	31685206	TTGTCGCCCACGTTAAGTATCTTGC	48	57.9	25	-2.799	-	0.084
MHC-322	chr6	31691437	31691462	CAAGGTCTTTAGCGTGGAGCTAGGA	52	58.08	25	-3.641	-	-1.334
MHC-323	chr6	31696979	31697004	CTTCCAAGATGGTGATGAACTGCCG	52	58.16	25	-2.028	-	0.214
MHC-324	chr6	31700985	31701010	GCATAGTGAGAAAACGGCACCACTT	48	58.05	25	-3.638	-	0.048
MHC-325	chr6	31706638	31706663	ATTTGAGCCCCTTAGCTGATGTGGA	48	57.97	25	-4.371	-	-0.364
MHC-326	chr6	31712260	31712285	CAAAGTGTCTGTGCAGGTGTTTCCA	48	58.09	25	-4.853	-	-0.156
MHC-327	chr6	31718174	31718199	TGGGTTTGCTCCCCTATTTCCCATT	48	58.12	25	-4.419	-	-0.474
MHC-328	chr6	31724649	31724674	TTCTTTCTCCTACATGCCCACTCCC	52	57.99	25	-3.415	-	999.211
MHC-329	chr6	31731066	31731091	TTCTCCCCAGGCCGACATGATAAAA	48	57.98	25	-4.889	-	1.202
MHC-330	chr6	31736746	31736771	AATCTGAGTACAACCCGACTGACCC	52	58.01	25	-3.745	-	1.036
MHC-331	chr6	31743113	31743138	AGGAGCACAGAGAGCCTAAAAGACC	52	58	25	-2.679	-	0.854
MHC-332	chr6	31747679	31747704	AGACTTGCACACATACAAGCAGCAG	48	58.05	25	-3.465	-	-0.252
MHC-333	chr6	31753580	31753605	CATGAAGTTGTCCCACACCAAGGTC	52	57.98	25	-2.885	-	1.184
MHC-334	chr6	31758268	31758293	TATCGCCAGCCTCATTGGGAAAGTA	48	57.82	25	-2.351	-	0.084
MHC-335	chr6	31763992	31764017	TGGTGACAGGAATAGAGTGGCAGAC	52	58.01	25	-2.655	-	0.312
MHC-336	chr6	31769899	31769924	GCTAGTGGATCTAGGTGCTGAAGGT	52	57.6	25	-3.095	-	-0.532
MHC-337	chr6	31775922	31775947	AGTGAAGACCCCTCTGACCATCAAC	52	57.94	25	-0.815	-	0.786
MHC-338	chr6	31782177	31782202	CTGCAAATGTCGGGGAGGAGAAATC	52	57.93	25	-2.829	-	0.453
MHC-339	chr6	31789157	31789182	ACAATTAACAGGAAAACTACCACAC	36	52.05	25	-2.64	-	0.744
MHC-340	chr6	31795221	31795246	ATGAGAAGGTCCGAACGAAGTGGAA	48	57.96	25	-3.473	-	-0.216
MHC-341	chr6	31801381	31801406	CCCACCATCTCCAGCAGTGAAATAA	48	56.79	25	-3.388	-	0.296
MHC-342	chr6	31809111	31809136	CATCAAGCAGGATTTGTCCCTCCAC	52	57.86	25	-2.679	-	-0.004
MHC-343	chr6	31815226	31815251	CCTTCCTGTCAATTAGGCGCTGAAG	52	57.94	25	-6.397	-	0.896
MHC-344	chr6	31822020	31822045	AAACATCAGAAAACGCAGGAGTCGG	48	58.06	25	-2.241	-	0.714
MHC-345	chr6	31829901	31829926	TCTTTGAGGTGGACTGTTGGGACTC	52	58.12	25	-2.164	-	0.634
MHC-346	chr6	31835458	31835483	TTAGGTGCGAGAGCCTTTTGAATGC	48	58.1	25	-2.919	-	-1.076
MHC-347	chr6	31840574	31840599	TGTAAAGTGTCCACGGCTACCCAAT	48	58.17	25	-2.689	-	0.584
MHC-348	chr6	31846162	31846187	CCAAACCTGCACCAACAGAACTCAT	48	57.91	25	-2.829	-	-0.144
MHC-349	chr6	31850847	31850872	GCCATTGCTTTGATCTTCCTTCCCA	48	57.78	25	-3.269	-	0.553
MHC-350	chr6	31856652	31856677	CTCCTGCCACTTGTCCCAATCTTTC	52	57.8	25	-1.593	-	1.692
MHC-351	chr6	31864007	31864032	AGTAAGAAAATCCCCTGCCGCTACA	48	57.99	25	-2.517	-	1.752
MHC-352	chr6	31870214	31870239	TTCGGGTGGAGTAAGGGAAGATCAC	52	57.77	25	-3.749	-	1.205
MHC-353	chr6	31876177	31876202	TAGGGCTTATGGTCTGGAGGGGTTA	52	57.93	25	-2.025	-	1.672
MHC-354	chr6	31883521	31883546	ACTGTCCTTTCTTTGGGGTCCATGT	48	58.02	25	-2.979	-	0.914
MHC-355	chr6	31889289	31889314	GGGCTGTCTTTTCGCCATTTCTTCT	48	58.03	25	-3.882	-	-0.734
MHC-356	chr6	31896627	31896652	GAGGTCCCCATCTCCCTCAAGATTC	56	57.87	25	-3.591	-	-0.343
MHC-357	chr6	31902180	31902205	CCTCTTTGGCCGGGATTATTTGTCC	52	57.91	25	-5.635	-	0.667
MHC-358	chr6	31906623	31906648	CCAAGTCTGCTCTGCTACCCTATGT	52	57.83	25	-2.199	-	0.814
MHC-359	chr6	31912241	31912266	CCAGCCATGAGACTGTTGCTTCTTG	52	58.33	25	-3.895	-	0.646
MHC-360	chr6	31919073	31919096	TGCAGAGAGATTGTATCAGGGTC	47.83	53.67	23	-2.829	-	0.504
MHC-361	chr6	31926874	31926899	TTCTGTGGGTCAGGGAGACTAACAC	52	57.65	25	-2.768	-	-0.494
MHC-362	chr6	31934234	31934259	CGCAGAGTGTGTCGGAAAATGACTT	48	58.07	25	-2.241	-	-0.172
MHC-363	chr6	31940692	31940717	CTCCCTTCCTCCTTAGCATCACTGG	56	58.12	25	-2.679	-	0.544
MHC-364	chr6	31946601	31946626	CAGAGGTTTGAGGGCAATGAGTGTG	52	58.04	25	-2.655	-	0.964
MHC-365	chr6	31954180	31954205	TGGACCCAACCAAACCCAGTGATAA	48	58.02	25	-2.948	-	0.414
MHC-366	chr6	31960546	31960571	GTGACTCTTGTGGAGATGGGATGGT	52	57.99	25	-3.006	-	-1.034
MHC-367	chr6	31955209	31955234	AGCCTTTACCTCTTGCAGGTCATCA	48	57.93	25	-2.829	-	-0.942
MHC-368	chr6	31961188	31961213	TCCTCAGATTGTCCAACTCCAGCTC	52	58	25	-2.475	-	1.512
MHC-369	chr6	31967316	31967341	AGGAAGGGTGGTGGTTGTGAAGAAT	48	58.02	25	0.773	-	1.85
MHC-370	chr6	31973075	31973100	GGCGATGGGCTGGTAGAGAATATCA	52	58.01	25	-2.919	-	-0.236
MHC-371	chr6	31978735	31978760	AGGCTGCTTGGTCATTTGCTTGATT	44	57.95	25	-4.19	-	0.714
MHC-372	chr6	31984617	31984642	CTGCTCATTCCTTCACTCCTCCAGT	52	58	25	-2.199	-	0.865
MHC-373	chr6	31991500	31991525	AGGACATTCAGCAAAACACAGACGG	48	57.99	25	-2.689	-	1.262
MHC-374	chr6	31997708	31997733	CCTTGGGCAGCAAGATCAATGTGAA	48	58.02	25	-6.259	-	-1.502
MHC-375	chr6	32004105	32004130	ACCATGAAGAAGGCAGTAGCTGTCA	48	57.94	25	-4.371	-	-0.736
MHC-376	chr6	32008919	32008944	ATGATTGTTCCATTTCACCCAGCCG	48	58.08	25	-1.443	-	1.555
MHC-377	chr6	32014869	32014894	TGGGCATCCAGCTTCTTCACCTTAT	48	57.97	25	-2.655	-	-0.336
MHC-378	chr6	32024435	32024460	CTACTACCCTATTCGCACCTGACCC	56	57.97	25	-2.241	-	1.842
MHC-379	chr6	32030445	32030470	CCTTGGGCAGCAAGATCAATGTGAA	48	58.02	25	-6.259	-	-1.502
MHC-380	chr6	32036842	32036867	ACCATGAAGAAGGCAGTAGCTGTCA	48	57.94	25	-4.371	-	-0.736
MHC-381	chr6	32044734	32044759	GGAGAAGGGATTGGAGACAGAAGCA	52	57.99	25	-2.679	-	0.312
MHC-382	chr6	32051070	32051095	TCACACACCATGCTCTTTCTAGCCT	48	57.94	25	-2.603	-	0.086
MHC-383	chr6	32056974	32056999	CACAAAACACAAAGTGCCCAAGAGC	48	57.96	25	-2.928	-	0.344
MHC-384	chr6	32061785	32061810	AGGAGGGAGAAGGCTATGACTAGGG	56	58.07	25	-3.437	-	1.054
MHC-385	chr6	32069108	32069133	GTCTCAGTTTCCGTTTCTTCCCTGC	52	58.06	25	-1.757	-	1.486
MHC-386	chr6	32075803	32075828	AGTGAGCAAACTAGAAGGTGGTCCC	52	58.17	25	-4.221	-	0.554
MHC-387	chr6	32080131	32080156	AGGGAGAAATTGCAGCTCACTCTGA	48	57.93	25	-3.044	-	-0.044
MHC-388	chr6	32085678	32085703	TCTGAAGTCCCAATAACCCCAGCTC	52	57.99	25	-2.475	-	1.486
MHC-389	chr6	32091834	32091859	CCAGATGAACTCTACCTTGGCTGGT	52	57.99	25	-3.915	-	0.015
MHC-390	chr6	32097549	32097574	ATCTCATAAGGCCATGTCTGCTCCC	52	58.16	25	-6.179	-	0.964
MHC-391	chr6	32106781	32106806	CCGACCCTCAAATCCTGTCACTTTG	52	57.82	25	-2.479	-	0.826
MHC-392	chr6	32112755	32112780	GAAGGAGGAGGAGAGGACCAAAGTG	56	58	25	-3.212	-	0.444
MHC-393	chr6	32119786	32119811	CATCACTCGCCCTACTTCTCTCCTC	56	57.98	25	-1.091	-	999.481
MHC-394	chr6	32125793	32125818	GGTGGAGGGGAATCACACAGATACA	52	57.76	25	-3.261	-	0.156
MHC-395	chr6	32130337	32130362	GGGAGAAGGGAGGAATCTGGTTAGC	56	58.11	25	-1.156	-	0.104
MHC-396	chr6	32136222	32136247	TTCCCCTGCGTTCTATACTCACCAC	52	58.07	25	-2.001	-	1.384
MHC-397	chr6	32144000	32144025	TACAGATGTTATGGGAGGGCAGAGC	52	57.88	25	-2.655	-	0.794
MHC-398	chr6	32150262	32150287	TCCCTGCCCTTGTTCCTCTATCCTA	52	57.94	25	-1.593	-	2.072
MHC-399	chr6	32157633	32157658	CAGATCCCCACCACGATGACTTGTA	52	58.07	25	-3.473	-	1.194
MHC-400	chr6	32162813	32162838	TGCGGGATTCTTTTGGGTTGAAGAC	48	57.97	25	-2.135	-	0.946
MHC-401	chr6	32167667	32167692	CACTCCTCCCGCCTTGACTTCTATT	52	58.06	25	-1.007	-	1.202
MHC-402	chr6	32174509	32174534	GCCAACAGTGCAAAGAATGGAGGAT	48	58.02	25	-2.829	-	-0.004
MHC-403	chr6	32179941	32179966	TTGTCCAGTTGTGTCCCTTCCTTGA	48	57.98	25	-0.468	-	1.464
MHC-404	chr6	32186771	32186796	AGTTGGGGAAAGCCCTATTCGAGAG	52	58.05	25	-3.786	-	-1.484
MHC-405	chr6	32193019	32193044	CCGATCTTCCCTCTTACTTACCGGG	56	57.97	25	-6.189	-	0.395
MHC-406	chr6	32198678	32198703	TGAGCACATCACAACTCCATCCTCA	48	57.94	25	-2.679	-	0.654
MHC-407	chr6	32205183	32205208	AATCCAAGGAGTGGTCAGAGAGCTG	52	58	25	-3.749	-	-0.394
MHC-408	chr6	32210936	32210961	CTGGGGAGAGAGACAAACAGGGATA	52	56.99	25	-2.117	-	1.285
MHC-409	chr6	32216861	32216886	TCAAACACCCACCAATGAACTCTGC	48	57.91	25	-1.191	-	0.694
MHC-410	chr6	32225017	32225042	TCACCAGCACCACTTTCTTCCTTTT	44	57.01	25	-2.679	-	1.044
MHC-411	chr6	32231244	32231269	GAGAGATGATTGGGGCATGGTGAGT	52	58.34	25	-3.551	-	1.002
MHC-412	chr6	32227023	32227048	CTCTCTGGTTTGCTGACTGGGGATT	52	58.45	25	-2.199	-	1.564
MHC-413	chr6	32231245	32231270	AGAGATGATTGGGGCATGGTGAGTC	52	58.34	25	-3.551	-	1.002
MHC-414	chr6	32241896	32241921	GTGGTGAGAGAGGTGGTGATGTCAG	56	58.54	25	-1.731	-	1.412
MHC-415	chr6	32246077	32246102	AGAGGGTCAGTAAATTCGTCCCCAC	52	58	25	-3.435	-	-0.054
MHC-416	chr6	32250858	32250883	ACAATGAGGACCACTACATGGGAGG	52	57.75	25	-4.105	-	-0.964
MHC-417	chr6	32255132	32255157	AGATTTGAGGAGAGAAGGCGCTTGA	48	58	25	-6.397	-	0.914
MHC-418	chr6	32267465	32267490	TTATGCTGTCCTGCCTGAGAGTAGT	48	57.01	25	-2.199	-	0.624
MHC-419	chr6	32286635	32286660	AGTTTCCGAGGATAAGGCAGACATA	44	55.34	25	-2.655	-	1.334
MHC-420	chr6	32293023	32293048	TTCGCCCTTTTCGAGCCTTTTGATT	44	57.97	25	-2.565	-	0.614
MHC-421	chr6	32300033	32300058	GACTTGGAGGGAGCACAAAACTCTG	52	57.76	25	-2.679	-	0.666
MHC-422	chr6	32305934	32305960	AGAGACATAGCAGGAGTTTAAGGGGC	50	57.91	26	-2.679	-	1.393
MHC-423	chr6	32313706	32313731	TGTCCTAACTTCCTGGGTACACTGC	52	57.95	25	-3.721	-	1.114
MHC-424	chr6	32320193	32320218	TGTCCTAACTTCCTGGGTACACTGC	52	57.95	25	-3.721	-	1.114
MHC-425	chr6	32324659	32324684	TGTGTGAGGATGCGATCTGACTGAA	48	58.02	25	-2.919	-	0.824
MHC-426	chr6	32329216	32329241	CATAAGGGAGAGGGAGTCAAGCAGG	56	58.12	25	-2.778	-	0.884
MHC-427	chr6	32335304	32335329	ACTGGGTGAGATTATGAGGTGGCAG	52	58.05	25	-2.655	-	0.424
MHC-428	chr6	32341659	32341684	CCTGAGTTGGGATAGGGCAAGTGAA	52	58.22	25	-2.655	-	0.575
MHC-429	chr6	32349030	32349055	TGAGGGACAAAATCTCAGCAGGGTT	48	58.09	25	-2.679	-	0.516
MHC-430	chr6	32355368	32355393	CTACTGCCCTAATTCCTCCCTCCCT	56	58.54	25	-1.675	-	2.85
MHC-431	chr6	32365426	32365451	GGTCAGTAGTGCAAGGAGCATAGGT	52	58.06	25	-2.829	-	-0.686
MHC-432	chr6	32371889	32371914	CCTAAGCAAATGATGGGAGTGTGGC	52	58.14	25	-2.679	-	0.674
MHC-433	chr6	32377427	32377452	TCATGCAGACCAGGGTTAAAGGGTC	52	58.45	25	-3.981	-	-0.563
MHC-434	chr6	32383456	32383481	TCACCATGAATCCCCATCCCTTCTG	52	58.03	25	-3.895	-	1.142

## Sheet: RSE Oligos for MHC II
Supplemental Table S2 (continued): RSE Oligo Sequences targeting MHCII
Primer ID	PrimerChr	Primer Start	Primer End	Sequence	GC	Tm	Size	Self Dimer	Hairpin Tm	Hairpin dG
MHC-435	chr6	32389788	32389813	CGTGAAGGTGGATGGTTGATTGGAC	52	58.1	25	-0.551	-	1.844
MHC-436	chr6	32396331	32396356	TCTTCTCCCACTCTGACGAGGATGG	56	59.03	25	-3.473	-	-0.054
MHC-437	chr6	32403441	32403466	ATCCAGAAAGGGGAATCGGAGAAGG	52	57.81	25	-2.359	-	0.124
MHC-438	chr6	32412632	32412657	TGGACGAGGATAGGAGGGTCTCTTT	52	57.96	25	-3.473	-	0.604
MHC-439	chr6	32421440	32421465	GGCCTCTGGTATTGACGGAGTAGTT	52	57.84	25	-4.475	-	-0.306
MHC-440	chr6	32428848	32428873	CCATGTCCTCTACTTGGCTCCATTG	52	57.17	25	-2.979	-	0.29
MHC-441	chr6	32436389	32436414	CAAACTCAAACTGCCATCCTCCCAG	52	58.03	25	-1.868	-	0.865
MHC-442	chr6	32444295	32444320	TCCTAGCTTGTATTTCCTGGGGCAG	52	58.04	25	-3.619	-	0.744
MHC-443	chr6	32459694	32459719	CCTGAGCCCTCCTAATTCCTTCTGG	56	58.11	25	-1.773	-	0.693
MHC-444	chr6	32467222	32467248	TGCTATATCCCTTCTCCTCCCTGTGA	50	57.86	26	-2.199	-	1.442
MHC-445	chr6	32475145	32475170	TTCACATGCTACCACATAGGCACTC	48	56.89	25	-3.415	-	-0.046
MHC-446	chr6	32483183	32483208	TCCCTCATTCCTGGTTCCCATTAGG	52	57.49	25	-2.94	-	0.593
MHC-447	chr6	32491687	32491711	AAAGCTGACTCTTGAGAATGTTGC	41.67	54.15	24	-4.266	-	-0.776
MHC-448	chr6	32513570	32513595	AGAAAGTTAGCCCATTGTCTGCTCT	44	56.2	25	-2.603	-	0.256
MHC-449	chr6	32524425	32524451	TTCAGTCTCCCACTCCCAACAATACT	46.15	57.21	26	-1.017	-	0.846
MHC-450	chr6	32533893	32533918	GTGATGACACCCATAGCTCCTGAGA	52	57.6	25	-3.613	-	0.155
MHC-451	chr6	32551428	32551453	TCAGGCCCACTCTACAAAGGTTGAA	48	57.81	25	-4.943	-	-0.246
MHC-452	chr6	32559165	32559190	ACGATCCCATGAATGTCCACAAACC	48	57.57	25	-3.895	-	1.084
MHC-453	chr6	32568393	32568418	TCATTTCTCTCAGTCTCCCACTCCC	52	57.24	25	-0.448	-	0.846
MHC-454	chr6	32574401	32574426	CCACAGCACCAGCATGAAGTCAGAA	52	59.44	25	-4.335	-	-0.456
MHC-455	chr6	32582518	32582543	TCCCATGCACTCACACCTTAGAACA	48	57.87	25	-3.281	-	1.324
MHC-456	chr6	32590585	32590610	GCAATGGAGAGTCCGAAGTTGCTTT	48	58.04	25	-2.638	-	0.087
MHC-457	chr6	32598134	32598159	CAAAGACTGGCTCCACCCAAAGTTC	52	58.2	25	-2.025	-	0.224
MHC-458	chr6	32606363	32606388	CAGGGGCTTCAGTGTTTGTGGTTAG	52	57.98	25	-2.116	-	1.104
MHC-459	chr6	32614161	32614186	GGAGCAGGTACAGGACTTCCAAAAT	48	56.74	25	-3.721	-	-0.056
MHC-460	chr6	32621226	32621251	TCAGAAGCAAAATTCCTGCACCCTT	44	57.36	25	-4.975	-	-0.064
MHC-461	chr6	32627471	32627495	GACTCAAAGCACAAAGCACAGGGT	50	58.07	24	-2.679	-	-0.656
MHC-462	chr6	32637360	32637385	GGGTTTGGTTTGGGTGTCTTCAGAT	48	57.36	25	-0.436	-	1.342
MHC-463	chr6	32655471	32655497	AGTTTCCAGCATCTCATACACCACCA	46.15	58.01	26	-2.679	-	1.494
MHC-464	chr6	32663349	32663375	TGTGAACCTGCATAGATAACACCGGG	50	58.65	26	-6.189	-	0.916
MHC-465	chr6	32680918	32680940	TCAAAGACCAACAATTCCACCC	45.45	53.12	22	-0.537	-	2.182
MHC-466	chr6	32690253	32690278	GCAGGAGGAAAGGAACTATCTGGGT	52	57.75	25	-2.388	-	-0.036
MHC-467	chr6	32699473	32699498	TAAATGCCAGAAGTTGGGATATGAA	36	52.52	25	-2.394	-	-0.929
MHC-468	chr6	32719829	32719854	GGATTAGGTAGAGTTGGGGCTGAGT	52	57.28	25	-2.025	-	1.086
MHC-469	chr6	32727347	32727372	AGACAAGAACAAGCAACAACCTGGC	48	58.37	25	-3.292	-	1.093
MHC-470	chr6	32735190	32735215	AACACGCAAAATTACTCCCATGTGC	44	57.1	25	-2.979	-	0.746
MHC-471	chr6	32745106	32745131	AGGTTCTTTCTCCCTGTGTTCCACC	52	58.33	25	-2.167	-	0.624
MHC-472	chr6	32752829	32752854	GAGTTTAGGTACAGTGGAACAGCAC	48	55.64	25	-3.721	-	0.385
MHC-473	chr6	32759815	32759840	CTGGGTGAATGTGCCTGTAATGCAA	48	58.02	25	-3.281	-	0.614
MHC-474	chr6	32768333	32768358	TCTCACAGACCGACAATTCCACTCA	48	57.67	25	-2.479	-	1.142
MHC-475	chr6	32776596	32776621	TTTGCTGGCATTGAGAAGACACACC	48	58.2	25	-4.435	-	1.412
MHC-476	chr6	32786394	32786419	CTCTTACACTGCATTTCCTGCCCAC	52	58.1	25	-2.829	-	-0.584
MHC-477	chr6	32794130	32794155	GATCGTAGCTTTCCCCTGTGATCCT	52	57.89	25	-3.619	-	1.107
MHC-478	chr6	32801364	32801389	TGAAAAGTGGGGTTGGCTCTCAAAT	44	57.06	25	-2.025	-	0.784
MHC-479	chr6	32822112	32822137	ACGACTTTGGGATAGGTGGACTCAC	52	58.01	25	-3.473	-	0.105
MHC-480	chr6	32829848	32829873	GGACACGACCTTCACCACTAAGAGT	52	57.97	25	-3.473	-	1.003
MHC-481	chr6	32837713	32837738	AACTCACAACGTCCTCTCCTGACTC	52	57.97	25	-2.997	-	1.026
MHC-482	chr6	32847469	32847494	AAAGGTAAAGATGGCTGGGTGGTGA	48	58.08	25	-2.025	-	1.144
MHC-483	chr6	32856315	32856340	AGTTGACCTTCCCCAAAAGCCACTA	48	58.03	25	-1.443	-	1.496
MHC-484	chr6	32865809	32865834	CAATGTGGCAGGAGTGTTGAGGAAG	52	58.04	25	-2.655	-	1.264
MHC-485	chr6	32876881	32876906	AAAATCCTACCGAGCACGCTGTTTG	48	58.34	25	-3.643	-	0.264
MHC-486	chr6	32884466	32884491	TTCCGTAGACCAGAAACAGCACACT	48	58.13	25	-2.679	-	1.363
MHC-487	chr6	32902866	32902891	TCCAAATGAGGAGCCCATCCCTAAT	48	57.24	25	-2.624	-	-0.304
MHC-488	chr6	32910312	32910337	TTTTGTGTGCTCTTTCAGGGAGTGG	48	57.62	25	-2.27	-	0.198
MHC-489	chr6	32927538	32927563	ACATTCAAGGGCCATAGGAGGAGAG	52	57.57	25	-6.155	-	0.204
MHC-490	chr6	32936363	32936388	AACTGCCCAGCAAGAAACAACACTT	44	58.01	25	-2.679	-	0.514
MHC-491	chr6	32943513	32943538	GTGTTGGAATGGGCAGAATATGGGG	52	57.89	25	-2.655	-	0.774
MHC-492	chr6	32950788	32950813	ACATTGGAGTAGGAGCTGCAAAGGA	48	57.93	25	-4.844	-	-0.456
MHC-493	chr6	32958615	32958640	GACCTTAGAAGCAGGGGTTGAGTTG	52	57.29	25	-2.679	-	0.386
MHC-494	chr6	32966868	32966893	ACAGCCACCATTACTCAGGACAACA	48	58.11	25	-2.64	-	0.264
MHC-495	chr6	32974931	32974956	CCGACCGCTTGCTGTAACTATCTTG	52	58.02	25	-2.479	-	1.624
MHC-496	chr6	32982481	32982506	TTGTGAACCACCTGCTACTGTTTGC	48	58.15	25	-2.625	-	0.624
MHC-497	chr6	32988770	32988796	ACCAACCTGAGCTAAAGAATGAGGCT	46.15	58.01	26	-3.641	-	0.265
MHC-498	chr6	33000036	33000061	GCAGATCCATATACTGAAGGCCCGA	52	58.01	25	-4.943	-	-0.044
MHC-499	chr6	33009713	33009738	GGGTGAGAAGGTGGAAGGATTCACT	52	57.92	25	-2.884	-	-0.104
MHC-500	chr6	33017555	33017580	CCGGTGAAAGCAGGATTGACTTGAA	48	57.75	25	-4.051	-	0.328
MHC-501	chr6	33027309	33027334	TGGCAGGATTCAGAGTAAAGACCCC	52	57.99	25	-2.655	-	1.354
MHC-502	chr6	33037244	33037269	TGGCTGTCATTGTCTACTGTTTCAC	44	55.55	25	-2.025	-	1.412
MHC-503	chr6	33068996	33069021	GGAGAGAAAAGCAGTTGCATACCCC	52	57.86	25	-3.979	-	-0.456
MHC-504	chr6	33076718	33076743	ACTAGAGTGGGTTGCGACTTGTAGG	52	58.02	25	-4.221	-	1.064
MHC-505	chr6	33085092	33085117	GTGTCCACCAACCTGATCCGTAATG	52	57.65	25	-2.663	-	1.202
MHC-506	chr6	33092698	33092723	TGGCCTCTAGTTCTATGTGTGGCAG	52	58.07	25	-5.699	-	-0.634
MHC-507	chr6	33104120	33104145	GCCCCACAGGCTTCCTCTAAATACT	52	58.04	25	-2.959	-	-1.245
MHC-508	chr6	33111813	33111838	CATGGTAGTGTAGGTGGTGTGTCCA	52	57.95	25	-2.101	-	-0.186
MHC-509	chr6	33126552	33126577	AAATCACATCGAGGGAAGAGGCTGT	48	57.99	25	-3.514	-	1.263
MHC-510	chr6	33141291	33141316	CTGGAGCCACTCAGGAGCATAAAGA	52	58.06	25	-2.792	-	-0.496
MHC-511	chr6	33149590	33149615	GGCACTTCCACACCTTCGATTCATT	48	57.81	25	-2.655	-	0.453
MHC-512	chr6	33158027	33158052	ACCTGACCCAACAATATAGCCCAGG	52	58.03	25	-4.354	-	-0.233
MHC-513	chr6	33165488	33165513	TGCTTGTTCAGTACCCATGCTGTTG	48	57.98	25	-2.509	-	0.618
MHC-514	chr6	33172995	33173020	AGAAGAGGGGCAGACAGACTAATGC	52	58.06	25	-2.655	-	0.305
MHC-515	chr6	33181304	33181329	CCCTCCCCTAAAACTCCCTCTTCAC	56	57.99	25	0.831	-	2.834
MHC-516	chr6	33188377	33188402	TCCAGAATACGGGCACCAAAGATGA	48	57.99	25	-2.689	-	-0.816
MHC-517	chr6	33197471	33197496	TCAGGTTAGAAATGGGGAGACAGCC	52	57.99	25	-1.499	-	0.982
MHC-518	chr6	33207275	33207300	TAGGGGAATGAACCAGCCGATGAAA	48	57.98	25	-2.628	-	0.464
MHC-519	chr6	33215219	33215244	CATGTATCTGAACGCGGAAGCTGAG	52	58.08	25	-7.061	-	-1.016
MHC-520	chr6	33227783	33227808	GTGCAGGTGGAGAGATGTGATTTCC	52	57.64	25	-2.829	-	1.005
MHC-521	chr6	33234427	33234451	ATCAAATCAAGGTACATGCGCTGC	45.83	56.63	24	-6.571	-	1.044
MHC-522	chr6	33241344	33241369	TGGGTAAACAGTCCAGCTCTACCAG	52	57.71	25	-3.182	-	0.428
MHC-523	chr6	33247955	33247980	GAGGTGAGGGCACAAAGGTAGAGAA	52	57.94	25	-3.376	-	-0.544
MHC-524	chr6	33255314	33255339	ACCTGGCAAATCCAGTGACAAATCC	48	57.72	25	-3.507	-	-1.472
MHC-525	chr6	33264197	33264222	ACTCTACCTTCAGTCCCTCCTACCC	56	57.96	25	-0.501	-	0.894
MHC-526	chr6	33273465	33273490	GTCTTCTTGGCTTCTGTTGCATGGT	48	57.97	25	-3.551	-	0.464
MHC-527	chr6	33282386	33282411	ACAGGGTCACATCCTTTGGTGAACT	48	58.03	25	-3.863	-	-0.199
MHC-528	chr6	33290180	33290205	TAAATCCATGTCGGGGAGGCAGAAA	48	57.98	25	-2.979	-	0.324
MHC-529	chr6	33296225	33296250	AAGTAAGAAGCTCTCAAGCCGGTCA	48	57.95	25	-5.501	-	-0.384
MHC-530	chr6	33303999	33304024	AGATTGAGAAGGGATGGGATGCTGG	52	58.09	25	-2.199	-	1.744
MHC-531	chr6	33312268	33312293	TTTCAGCGTGGGTTTCAAGTCTGTC	48	57.94	25	-2.001	-	1.266
MHC-532	chr6	33319830	33319855	TGGGGCTCTTGTCTCCATCTTTACC	52	57.99	25	-2.025	-	0.964
MHC-533	chr6	33328916	33328941	GCCCTAAGCTATCCAAGCATCTCCT	52	57.93	25	-3.329	-	-1.194
MHC-534	chr6_GL000251v2_alt	3833620	3833645	GGCATCTGCTAACCTTGGACGTTTC	52	58.39	25	-3.976	-	-0.136
MHC-535	chr6_GL000251v2_alt	3857209	3857234	TGGTAAATCAAACGGAGAGGAGGCA	48	57.94	25	-2.689	-	1.163
MHC-536	chr6_GL000251v2_alt	3865417	3865442	TCTTAGGAAGGCACTCACTTGCGAT	48	58.01	25	-2.919	-	0.254
MHC-537	chr6_GL000251v2_alt	3873049	3873074	CTGAAGAGCCTACCAAACCTTGCAC	52	58.04	25	-2.829	-	0.844
MHC-538	chr6_GL000251v2_alt	3880755	3880780	GTGGACAAAGCCAACCTGGAAATCA	48	57.9	25	-4.766	-	-0.496
MHC-539	chr6_GL000251v2_alt	3911674	3911699	AAGAACTATGAACCCCTCCACCCAC	52	57.92	25	-1.215	-	1.464
MHC-540	chr6_GL000251v2_alt	3918882	3918908	AAATGAGCAGGTCCCAGACTTTGAGT	46.15	58.17	26	-2.679	-	0.464
MHC-541	chr6_GL000251v2_alt	3924918	3924943	GTGTTCAATCCCTCATCCTGGTTCC	52	57.33	25	-2.94	-	1.374
MHC-542	chr6_GL000251v2_alt	3933679	3933704	GACTTCTGATTGACTTGCTGGCTGG	52	58.1	25	-3.805	-	1.242
MHC-543	chr6_GL000251v2_alt	3942891	3942916	GCATATACTGATGGCGAGCGGATTC	52	58.02	25	-2.919	-	0.594
MHC-544	chr6_GL000251v2_alt	3951494	3951519	TCAAATGCAGACAAACATGGAATGA	36	54.01	25	-4.105	-	-0.634
MHC-545	chr6_GL000251v2_alt	3972082	3972107	GTTCTGATTGACTTGCTGGCTGGTT	48	57.97	25	-3.805	-	1.242
MHC-546	chr6_GL000251v2_alt	3988599	3988624	ATCCCTCATTCCCGGTTCCCATTAG	52	57.86	25	-5.063	-	1.184
MHC-547	chr6_GL000251v2_alt	3999288	3999313	TCTCTGTCACTACAACCCACACCAG	52	57.9	25	-1.692	-	0.814
MHC-548	chr6_GL000251v2_alt	4007053	4007078	ACTGAGCATCTCTGGTTCACAGGTC	52	58.24	25	-3.511	-	-0.424
MHC-549	chr6_GL000251v2_alt	4014739	4014764	ACAGGCAGGTTGACATTGGTAGGAT	48	57.91	25	-2.655	-	0.794
MHC-550	chr6_GL000251v2_alt	4022418	4022443	CTCGCTGGGGAACAGGAACTATCAT	52	58.12	25	-2.842	-	-0.564
MHC-551	chr6_GL000251v2_alt	4028701	4028726	CCTGTGGTGAACGAGATGGAAATGG	52	57.87	25	-3.473	-	0.534
MHC-552	chr6_GL000251v2_alt	4036645	4036670	TGTTTTCCACAAGTCTGCATCTCCC	48	57.45	25	-2.829	-	0.814
MHC-553	chr6_GL000251v2_alt	4046339	4046367	TGGTGTTCACAGAGAGAAATATAGTAGA	35.71	53.35	28	-4.076	-	1.142
MHC-554	chr6_GL000251v2_alt	4056089	4056109	GGAACTGGCACAGGTGGGGA	65	58.25	20	-3.592	-	-1.604
MHC-555	chr6_GL000251v2_alt	4064481	4064506	TCTACAAATGCTGCCCAACTCAGAC	48	57.29	25	-3.758	-	0.256
MHC-556	chr6_GL000251v2_alt	4072207	4072232	GAGACAAAGATGCAGAGAGACACGC	52	57.97	25	-3.289	-	0.844
MHC-557	chr6_GL000251v2_alt	4079938	4079964	GGGAAAAGTGGTAGTCAACACAGCTC	50	57.85	26	-3.273	-	0.036
MHC-558	chr6_GL000251v2_alt	4094243	4094266	CAAAGACCAACAATTCCACCCAA	43.48	53.92	23	-0.537	-	2.182
MHC-559	chr6_GL000251v2_alt	4133107	4133132	GTCATGGTTGTGTGGAAAGCTAGGA	48	56.99	25	-3.329	-	1.404
MHC-560	chr6_GL000251v2_alt	4154697	4154722	CCTCTTGACACTAGCAGACATGCAC	52	57.67	25	-3.415	-	-1.164
MHC-561	chr6_GL000251v2_alt	4162365	4162390	GTAAGTGCAGGGAATCTGAACCAGT	48	56.75	25	-2.829	-	-0.844
MHC-562	chr6_GL000251v2_alt	4169561	4169586	AGTACAACCCTCTTTCTAGCCACGG	52	58.01	25	-3.745	-	1.752
MHC-563	chr6_GL000251v2_alt	4177149	4177174	TTCCATGTGTGGTAGGATTGGGGAG	52	57.98	25	-2.979	-	-0.194
MHC-564	chr6_GL000251v2_alt	4185154	4185179	TGGGGATACCAACCACAATCCATCT	48	57.42	25	-3.541	-	-1.636
MHC-565	chr6_GL000251v2_alt	4197002	4197027	GCCTGTCTCTGGACTTAACATCCCA	52	58	25	-2.528	-	-0.244
MHC-566	chr6_GL000251v2_alt	4204985	4205010	GCATTCGCAGCTTGGAGGTCTTTTA	48	58.1	25	-2.481	-	0.153
MHC-567	chr6_GL000251v2_alt	4213238	4213262	GAAAGAGGAATGGGGAGGCAGTGT	54.17	58.38	24	-2.655	-	1.613
MHC-568	chr6_GL000251v2_alt	4257734	4257759	AAGAAAAGGGAGGGAGATGGAGTGC	52	58.21	25	-1.125	-	2.072
MHC-569	chr6_GL000251v2_alt	4266043	4266068	GCCTGCTCACTAGATAACGCCTACT	52	57.97	25	-4.221	-	0.764
MHC-570	chr6_GL000251v2_alt	4273183	4273208	TGCCTGGAGTTGTTTCTAGCCATGA	48	58.16	25	-4.212	-	1.114
MHC-571	chr6_GL000251v2_alt	4281601	4281626	TTTGCTTCCCACAAACCACTGACAC	48	58.31	25	-2.199	-	0.926
MHC-572	chr6_GL000251v2_alt	4314251	4314278	ACACATGGTGAAATTAGAGCAGGACAT	40.74	56.76	27	-4.105	-	-0.346
MHC-573	chr6_GL000251v2_alt	4343340	4343365	GAAGCCCAGATTTTGCACCTCTCTC	52	57.87	25	-2.829	-	0.644
MHC-574	chr6_GL000251v2_alt	4351172	4351197	GGGAAGGGAGAACAGGTCAATGTCT	52	57.92	25	-0.957	-	0.784
MHC-575	chr6_GL000251v2_alt	4358929	4358954	GGAGTTGGACCTATGGAGTGGGTTA	52	57.22	25	-2.732	-	0.286
MHC-576	chr6_GL000251v2_alt	4365329	4365354	GCCAGATCATTTCCAATAGGTGCCC	52	57.96	25	-3.749	-	0.414
MHC-577	chr6_GL000251v2_alt	4373103	4373128	CCTAGCCATCCAGCTCCCACATTTA	52	58.1	25	-2.528	-	-0.144
MHC-578	chr6_GL000251v2_alt	4381200	4381225	GATTACATACCCCGTACCAAGCCGA	52	58.19	25	-2.479	-	0.774
MHC-579	chr6_GL000251v2_alt	4388774	4388799	AAAAGGCGTAAAGCGGAAAGCAGAT	44	58.04	25	-2.679	-	-0.656
MHC-580	chr6_GL000251v2_alt	4397006	4397031	GCACTTGCAGACATACAGCTCTCAG	52	57.96	25	-3.556	-	-0.047
MHC-581	chr6_GL000251v2_alt	4413355	4413380	GCCTTTCCTCTTCTGGCTTTGGATT	48	57.48	25	-3.337	-	-0.245
MHC-582	chr6_GL000251v2_alt	4423093	4423118	CCATGAGATGAAAGACGGGAAAGCC	52	57.93	25	-3.895	-	0.314
MHC-583	chr6_GL000251v2_alt	4431289	4431314	GGTTCTGCTTTCACTTTCCCGTCTC	52	58.06	25	-2.199	-	1.662
MHC-584	chr6_GL000251v2_alt	4479817	4479840	GATGTGGTCATCTGCATGGAAGT	47.83	55	23	-3.551	-	-0.353
MHC-585	chr6_GL000251v2_alt	4487366	4487391	GCAAGACAGACAGACTCAGACCTCA	52	57.97	25	-1.605	-	1.084
MHC-586	chr6_GL000251v2_alt	4495642	4495667	AGGTACTGGTGGCAGAGATCCAAAA	48	57.62	25	-6.759	-	-1.084
MHC-587	chr6_GL000251v2_alt	4503835	4503860	CCCAGGAAATAAAGGTGGTGCCAAG	52	58.01	25	-4.169	-	-0.156
MHC-588	chr6_GL000251v2_alt	4536806	4536831	GAGAGAAATCCCGTGAAGGAGACCA	52	57.78	25	-2.64	-	-0.296
MHC-589	chr6_GL000251v2_alt	4551800	4551825	AGAGAAAGGCAGGGAAGTAGGGAGA	52	58.12	25	-2.655	-	2.272
MHC-590	chr6_GL000251v2_alt	4559778	4559803	TGGGCTTAGAACAGGAAACAAGGGA	48	57.79	25	-2.025	-	1.686
MHC-591	chr6_GL000251v2_alt	4568391	4568416	TGGTTGTATCACGCTGGTCAAATGC	48	58.33	25	-1.999	-	1.284
MHC-592	chr6_GL000251v2_alt	4576409	4576434	AGTTGCAGAAAACTCGGAAGGCATC	48	58.04	25	-2.829	-	0.714
MHC-593	chr6_GL000251v2_alt	4606920	4606945	TCCTCATGTCACGCATTTTGGACAC	48	58.05	25	-3.384	-	-0.043
MHC-594	chr6_GL000251v2_alt	4615023	4615048	TTTTCTCTTTTCTGCCCATCAGGCG	48	58.03	25	-3.034	-	-1.335
MHC-595	chr6_GL000251v2_alt	4621277	4621302	TACGGAGCGGGTAATAGGAGAGACA	52	58.11	25	-2.689	-	0.614
MHC-596	chr6_GL000251v2_alt	4628836	4628861	CATCTTCCTGTGCCTACTCCTTGCT	52	58.29	25	-2.199	-	0.914
MHC-597	chr6_GL000251v2_alt	4639962	4639987	CCCCAAAACTGAGAAGACCCAGACT	52	58.1	25	-3.406	-	-0.676
MHC-598	chr6_GL000251v2_alt	4657649	4657674	TGCATGTACCACAGTAGCGAGAGAA	48	57.8	25	-3.417	-	0.804
MHC-599	chr6_GL000251v2_alt	4665960	4665985	GCCTAAATGCAGTCTCACACACACA	48	57.76	25	-3.289	-	0.753
MHC-600	chr6_GL000251v2_alt	4691309	4691334	GTGGGTCCAGACAAATAAGCTCTGC	52	57.87	25	-3.381	-	0.364
MHC-601	chr6_GL000251v2_alt	4699597	4699622	TCAATCCCTTGGCTCCTTTACCTCC	52	57.98	25	-2.025	-	0.756
MHC-602	chr6_GL000251v2_alt	4723157	4723182	CACCTTGCTTTGACCCCAGTTGTTT	48	58.3	25	-2.199	-	1.084
MHC-603	chr6_GL000253v2_alt	3703513	3703538	TGGACTAGGGATTAGTTTGGGGCTG	52	57.74	25	-3.437	-	0.008
MHC-604	chr6_GL000253v2_alt	3709999	3710024	CCTGGAAATGGCACCAGTATTGTCC	52	57.85	25	-5.308	-	-0.772
MHC-605	chr6_GL000253v2_alt	3787875	3787900	GAACCTAGAAGGGAGGCCAGTACAC	56	58.07	25	-6.179	-	-0.256
MHC-606	chr6_GL000253v2_alt	3797937	3797962	ACTGGTTATTTGCAGTGAAGGGAGC	48	57.5	25	-3.388	-	-0.123
MHC-607	chr6_GL000253v2_alt	3814316	3814341	ATCCCAACTACTCACAGGGTTACAC	48	55.98	25	-3.477	-	-0.184
MHC-608	chr6_GL000253v2_alt	3822722	3822747	TAGTGTTTCCAGGGGCAGGATTCTC	52	57.99	25	-2.655	-	0.644
MHC-609	chr6_GL000253v2_alt	3847570	3847595	AGAACTACAGGTGTGAACCATCCGA	48	57.42	25	-2.781	-	-1.854
MHC-610	chr6_GL000253v2_alt	3864435	3864460	TCCACGGTATTTCAGTAACAAAAGC	40	54.16	25	-2.689	-	1.564
MHC-611	chr6_GL000253v2_alt	3876288	3876313	ATTTTCCAGTTTTGGCGGAGGGAGA	48	58.62	25	-2.174	-	-0.074
MHC-612	chr6_GL000253v2_alt	3887173	3887198	AAGTTGCTAAGTCTCCCTGAGCCAA	48	57.87	25	-2.617	-	0.191
MHC-613	chr6_GL000253v2_alt	3922801	3922828	TGGTGGATAAAGTGAACACAAGAGTCA	40.74	56.4	27	-4.484	-	0.156
MHC-614	chr6_GL000253v2_alt	3935932	3935957	CATCCTGCAATGTGCTGTCACTTCA	48	58.04	25	-2.952	-	-0.386
MHC-615	chr6_GL000253v2_alt	3943701	3943726	AACGCTGGAATCAAACAGAGCAGAC	48	58.05	25	-3.234	-	-0.044
MHC-616	chr6_GL000253v2_alt	3953629	3953654	CTGCCATGCACTCACACCTTAGAAC	52	58.11	25	-3.281	-	0.514
MHC-617	chr6_GL000253v2_alt	3964317	3964342	AGTACCAAGCTCCTTTTGTGGTGGA	48	58.04	25	-3.323	-	-0.622
MHC-618	chr6_GL000253v2_alt	3971937	3971962	CAAAGACATTACCCTTGCCCCAGAT	48	57.01	25	-1.711	-	1.386
MHC-619	chr6_GL000253v2_alt	3978538	3978564	AGCAAAACTAAATCCATATCCTCCCA	38.46	54.23	26	-2.679	-	1.103
MHC-620	chr6_GL000253v2_alt	3985804	3985830	TTAGCCCATCGTCTGCCTTATGTGAT	46.15	57.97	26	-1.647	-	1.154
MHC-621	chr6_GL000253v2_alt	3994414	3994439	CTCTGCTCCTTCTCTCAGCCCTTTA	52	57.54	25	-2.199	-	0.686
MHC-622	chr6_GL000253v2_alt	4003915	4003940	GTGGAGGACAACACAGGATCGTCTA	52	57.8	25	-2.736	-	0.445
MHC-623	chr6_GL000253v2_alt	4010233	4010258	TGTGCCTGTCAAACAAAGCAACTCT	44	57.79	25	-2.679	-	0.714
MHC-624	chr6_GL000253v2_alt	4026916	4026941	GGTTGTTGGAGCAGGTACAGACTTC	52	57.53	25	-3.721	-	1.164
MHC-625	chr6_GL000253v2_alt	4041179	4041204	CACTGTTCAAGCCCAGTCTCTTTCA	48	57.17	25	-2.608	-	0.338
MHC-626	chr6_GL000253v2_alt	4051359	4051384	CAGCAATGTCTTAGTGCTTCTGTGG	48	56.44	25	-2.856	-	-0.619
MHC-627	chr6_GL000253v2_alt	4062603	4062628	TGGTGCAAAGAACCCTAAATCCAAA	40	55.33	25	-2.829	-	0.526
MHC-628	chr6_GL000253v2_alt	4069551	4069576	GGAGATTAGAGGTGGCTCGAAGAAG	52	56.51	25	-3.915	-	0.195
MHC-629	chr6_GL000253v2_alt	4077527	4077552	GTGGGGATGAAAGGAGATGACCTGG	56	58.57	25	-3.162	-	-0.054
MHC-630	chr6_GL000253v2_alt	4086076	4086101	AAGGAGGAACCATACTCACACCTGG	52	57.69	25	-3.175	-	-0.256
MHC-631	chr6_GL000253v2_alt	4109226	4109251	TTGGTTGCTCATTTCTGGCATCCTC	48	57.79	25	-3.689	-	-0.069
MHC-632	chr6_GL000253v2_alt	4116264	4116289	AAATGGTCCCTGCCAAGATGTTCTC	48	57.25	25	-2.205	-	0.167
MHC-633	chr6_GL000253v2_alt	4163416	4163441	TTTGCTCCCTTACCGACCTGATTCT	48	57.7	25	-2.479	-	1.202
MHC-634	chr6_GL000253v2_alt	4181181	4181206	CCGTACTCCTCGCGGTTATAGATGT	52	57.82	25	-6.153	-	-0.105
MHC-635	chr6_GL000253v2_alt	4239642	4239667	CTTCTTCCTGCCCACACCTACCTTA	52	57.7	25	-1.593	-	1.412
MHC-636	chr6_GL000253v2_alt	4247967	4247992	CTCCTCATCACCAGGCAAAGCTCTA	52	58.06	25	-2.679	-	0.864
MHC-637	chr6_GL000253v2_alt	4287437	4287462	TGCCAGACTTGGAGTACGAACAAGA	48	57.9	25	-7.931	-	-0.942
MHC-638	chr6_GL000253v2_alt	4312190	4312215	ACTTGGGGAGGGTAATTCCTTGCTG	52	58.44	25	-2.199	-	0.164
MHC-639	chr6_GL000253v2_alt	4367359	4367384	CATGTGCTGCCACCTTTCGTTATCT	48	57.87	25	-3.758	-	0.116
MHC-640	chr6_GL000253v2_alt	4376271	4376296	GGAGAAACTAGACTGGGTGGAAGGG	56	58	25	-4.221	-	1.484
MHC-641	chr6_GL000253v2_alt	4383505	4383530	ACCCAAAGCTCAATCCTTCACCCTA	48	57.61	25	-2.679	-	1.796
MHC-642	chr6_GL000253v2_alt	4391632	4391657	CCTACCGATACAGAGCCTTCGAGTC	56	58.06	25	-2.565	-	0.016
MHC-643	chr6_GL000253v2_alt	4399602	4399627	ATAATGGGATGTGTTGGTTGGCAGC	48	58.07	25	-2.655	-	1.212
MHC-644	chr6_GL000253v2_alt	4407430	4407455	GTTCTGGACCTGTTTCCAACCACAA	48	57.56	25	-2.732	-	0.156
MHC-645	chr6_GL000253v2_alt	4435958	4435983	CTAGTGCCATGTGGAGGTAGCAGAG	56	58.42	25	-5.667	-	-0.296
MHC-646	chr6_GL000253v2_alt	4484364	4484389	AAGCTCAGGGGCTGTGAATGGAATC	52	59.03	25	-2.826	-	-0.732
MHC-647	chr6_GL000253v2_alt	4492441	4492466	GGAGCATTCACTACGGTCCATCTCT	52	57.9	25	-2.689	-	1.004
MHC-648	chr6_GL000253v2_alt	4501538	4501563	AGAGAGGTGAGGTGTGTGCAGTAAG	52	57.96	25	-2.829	-	1.512
MHC-649	chr6_GL000253v2_alt	4508853	4508878	AATAACCACTTGCTACCAGGCCAGT	48	58.15	25	-6.179	-	0.546
MHC-650	chr6_GL000253v2_alt	4573916	4573941	ATTTCTACAGCTAAGGGGTGCCGAA	48	57.99	25	-3.125	-	-0.113
MHC-651	chr6_GL000253v2_alt	4582406	4582431	CACACACCCCACACTATTCCGTTTC	52	58.05	25	-1.563	-	1.984
MHC-652	chr6_GL000253v2_alt	4588786	4588811	CACACCCATATTCCCAGGTCTGTCA	52	57.99	25	-2.102	-	0.686
MHC-653	chr6_GL000253v2_alt	4596562	4596587	CTGGACACAGACAAAATCCCAGCAG	52	58.04	25	-3.417	-	-0.295
MHC-654	chr6_GL000253v2_alt	4605394	4605419	GAAAGGAGAGGTTGAGGGTCAGGAG	56	58	25	-0.511	-	1.212
MHC-655	chr6_GL000253v2_alt	4613242	4613267	CTGGAGGAGAGCTGTAAAGGGAAGG	56	58.06	25	-3.749	-	-0.456
MHC-656	chr6_GL000253v2_alt	4620854	4620879	GCCACAGGCACTCACATGAAGATTT	48	58.03	25	-4.889	-	-0.545
MHC-657	chr6_GL000253v2_alt	4638202	4638227	AAGCCAGCATGGAATAATGTCGCAA	44	57.85	25	-3.551	-	-1.354
MHC-658	chr6_GL000255v2_alt	3618008	3618033	CTGCATTTCTCCATCTTCTTGCCCC	52	58.14	25	-2.829	-	0.616
MHC-659	chr6_GL000255v2_alt	3715014	3715039	GAGTTCTGATTGACTTGCTGGCTGG	52	58.1	25	-3.805	-	1.146
MHC-660	chr6_GL000255v2_alt	3737431	3737452	TGGCGACCACAAAGGGACACA	57.14	58.56	21	-2.919	-	-0.256
MHC-661	chr6_GL000255v2_alt	3836186	3836211	CATGCACACACCAGAGAAGATTCCG	52	58.17	25	-3.281	-	1.094
MHC-662	chr6_GL000255v2_alt	3905594	3905619	AGTTTTATGGTGGCAAAGCCTCAAC	44	56.49	25	-4.664	-	-0.684
MHC-663	chr6_GL000255v2_alt	3945166	3945192	TGCCCAAGACTGTAAGAACCTCTCAG	50	58.03	26	-2.188	-	0.074
MHC-664	chr6_GL000255v2_alt	3961607	3961632	GTGCCTTCATTCCCAGACAAACCTT	48	57.66	25	-1.593	-	1.712
MHC-665	chr6_GL000255v2_alt	4020936	4020961	CTACTGCATCTTCCTGTACTGCCCA	52	58.07	25	-3.265	-	0.516
MHC-666	chr6_GL000255v2_alt	4029458	4029483	CACCTTCTCCGCTGCTATTGTGAAG	52	57.95	25	-3.774	-	0.797
MHC-667	chr6_GL000255v2_alt	4047228	4047253	TTTCCCAGAACCCACGCTACTCTAC	52	58.02	25	-1.999	-	1.692
MHC-668	chr6_GL000255v2_alt	4061510	4061535	GGCAAAGGTGACAGAAGAAGCAACT	48	57.92	25	-2.679	-	0.594
MHC-669	chr6_GL000255v2_alt	4148221	4148246	ATGAATGTTGTGAAGGTCGCTTGGG	48	58.03	25	-1.695	-	0.176
MHC-670	chr6_GL000255v2_alt	4165742	4165767	CTTTCCATCGTTTGGCTTGAGGGAG	52	58.1	25	-3.125	-	-0.174
MHC-671	chr6_GL000255v2_alt	4181123	4181148	AGCTTTCCAACCAACCCCAAACTTC	48	58.06	25	-2.047	-	2.55
MHC-672	chr6_GL000255v2_alt	4189418	4189444	GTGCTCTCTCCTTTAATTTCCTGCTA	42.31	54.85	26	-2.199	-	1.414
MHC-673	chr6_GL000255v2_alt	4232303	4232328	TGGACATCTTCCAGTAGCCAAGTGT	48	57.64	25	-2.438	-	-0.544
MHC-674	chr6_GL000255v2_alt	4252342	4252367	AAATAAAGCAACACACCCCTGCCTG	48	58.18	25	-2.679	-	0.446
MHC-675	chr6_GL000255v2_alt	4274794	4274819	AGAAACTGGTCGAGAAGAGAGAGCG	52	58.11	25	-3.045	-	0.424
MHC-676	chr6_GL000255v2_alt	4282473	4282498	CAGGAAAGAGAAGCCACACACAAGG	52	57.98	25	-2.363	-	0.944
MHC-677	chr6_GL000255v2_alt	4288628	4288653	TACAGAGAGTTTAGGGTTCGGCCTG	52	57.78	25	-5.109	-	-0.254
MHC-678	chr6_GL000255v2_alt	4400270	4400295	TGCAACACCCATGACACAGAAAGTG	48	58.15	25	-3.895	-	-0.695
MHC-679	chr6_GL000255v2_alt	4407449	4407474	TGTGTGTAGATGTGGGAATGACCGT	48	57.95	25	-1.776	-	0.413
MHC-680	chr6_GL000255v2_alt	4414598	4414623	TCCAAAGTCAAGACAAGGATACCAG	44	54.51	25	-3.982	-	0.344
MHC-681	chr6_GL000255v2_alt	4432171	4432196	GCAGCCTCTTTGATTACCTGAACCC	52	57.86	25	-2.393	-	0.656
MHC-682	chr6_GL000255v2_alt	4454880	4454905	ACACACCACACAATCCAAGTAGCAG	48	57.46	25	-2.679	-	1.694
MHC-683	chr6_GL000255v2_alt	4462669	4462694	AGCTGCAACCCTTTTGCTGTATGAG	48	58.03	25	-4.844	-	-1.452
MHC-684	chr6_GL000255v2_alt	4470723	4470748	TCAGCATTCCTCCTACTCGCTCTTC	52	57.91	25	-2.679	-	0.746
MHC-685	chr6_GL000255v2_alt	4478886	4478911	CAGCAGAAATCCAAAGCAGACACCA	48	57.97	25	-2.679	-	0.444
MHC-686	chr6_GL000255v2_alt	4487105	4487130	CTATACCCCATAAGCCAGCCCACAT	52	57.91	25	-1.443	-	1.564
MHC-687	chr6_GL000255v2_alt	4493769	4493794	CTCCCTACCACAACCCACGAATGTA	52	58.01	25	-3.473	-	0.886
MHC-688	chr6_GL000255v2_alt	4502926	4502951	ACAAACCAGCCACATAGAACCCCTT	48	58.32	25	-1.443	-	1.054
MHC-689	chr6_GL000255v2_alt	4509249	4509274	GGAGGGGTTGAGTAGTAGAATGGGC	56	58.11	25	-0.951	-	1.732
MHC-690	chr6_GL000255v2_alt	4517232	4517257	ATACCTCTCCCTCTATATCCCCGCC	56	58.02	25	-1.101	-	3.065
MHC-691	chr6_GL000256v2_alt	3723061	3723086	CAAAGACAAGGAAACGCTGTGCCTA	48	57.99	25	-2.688	-	0.466
MHC-692	chr6_GL000256v2_alt	3731139	3731164	TTGTAATCACGTCGCAATACCAGGC	48	57.95	25	-2.812	-	1.333
MHC-693	chr6_GL000256v2_alt	3740634	3740659	TGGCATCAATTCACCAGTTCTTCTG	44	55.81	25	-2.655	-	0.005
MHC-694	chr6_GL000256v2_alt	3747310	3747335	GACCACAAGAGGGAAACCTAGTCCC	56	58.23	25	-3.625	-	-1.744
MHC-695	chr6_GL000256v2_alt	3754910	3754935	AGAACCCTTCCCCTAGCAACAGATG	52	57.98	25	-2.679	-	0.894
MHC-696	chr6_GL000256v2_alt	3799935	3799960	AAGAAAAGCGGAGGGTATGATGGGT	48	57.98	25	-2.135	-	1.672
MHC-697	chr6_GL000256v2_alt	3824509	3824534	CACACCAGCTCACAGGGCTATTTAC	52	57.65	25	-2.575	-	-0.822
MHC-698	chr6_GL000256v2_alt	3832112	3832137	AGAAGAGCAGGCAAGTCTCACTCAG	52	58.25	25	-2.958	-	0.646
MHC-699	chr6_GL000256v2_alt	3838126	3838150	AGCACAAACCAAGGTGGCATAACC	50	58.11	24	-3.354	-	-0.046
MHC-700	chr6_GL000256v2_alt	3885939	3885964	ACACCACCAGCATGAAGCCAGAAAA	48	59.32	25	-4.335	-	-0.146
MHC-701	chr6_GL000256v2_alt	3906890	3906915	ACACCAAGCCAGCATGACCTAGTAA	48	57.93	25	-4.335	-	0.344
MHC-702	chr6_GL000256v2_alt	3914945	3914973	ATCCATATCCTCTCATGTAGCAAGACCA	42.86	57	28	-3.063	-	1.394
MHC-703	chr6_GL000256v2_alt	3933129	3933154	TAAGCCAGAGGAACATGGCAGAGTT	48	57.93	25	-5.468	-	-1.862
MHC-704	chr6_GL000256v2_alt	3939369	3939394	GTTCCTGCTGGGCATTTGAGTTGAG	52	58.55	25	-5.239	-	-0.576
MHC-705	chr6_GL000256v2_alt	3948985	3949010	CAGTCTCCCACTCCCAACAATACCA	52	57.93	25	-0.652	-	0.846
MHC-706	chr6_GL000256v2_alt	3958925	3958950	AAAATGCTGTGATTCTCTGGACGCC	48	58.1	25	-2.199	-	1.442
MHC-707	chr6_GL000256v2_alt	3991971	3991996	GGAAAGCAAGAAGGGGATCAAGCTC	52	57.86	25	-3.725	-	0.456
MHC-708	chr6_GL000256v2_alt	4063683	4063703	TACCCCAGCCCAAGGAGAGC	65	57.45	20	-2.143	-	0.464
MHC-709	chr6_GL000256v2_alt	4092183	4092208	TCTACAGTCCAGGCAACAGGTACAC	52	57.96	25	-3.721	-	1.214
MHC-710	chr6_GL000256v2_alt	4111459	4111484	AGAAGTTTTATGGTGGCAAAGCCTC	44	56.02	25	-4.664	-	-0.684
MHC-711	chr6_GL000256v2_alt	4118147	4118172	GAGAATGGAGATGCAGTAGCCCTCA	52	57.89	25	-3.289	-	-0.576
MHC-712	chr6_GL000256v2_alt	4126097	4126122	ACACAGAGAACACAAGCAAGAGACC	48	57.19	25	-2.679	-	998.461
MHC-713	chr6_GL000256v2_alt	4142714	4142739	AGGGGAAGTGAACTGGAAGCTACTC	52	57.71	25	-3.329	-	0.764
MHC-714	chr6_GL000256v2_alt	4185694	4185719	ATGCTAGTGGAGGAAAGGAATGGCA	48	57.97	25	-3.046	-	0.815
MHC-715	chr6_GL000256v2_alt	4212374	4212399	TCTCAGGGGAGTTTCTGGACAATGC	52	58.46	25	-2.408	-	0.116
MHC-716	chr6_GL000256v2_alt	4333650	4333675	TTCCTTGCCCATACTCTGTGACTCC	52	58	25	-1.593	-	1.006
MHC-717	chr6_GL000256v2_alt	4364466	4364491	CATCTCCTTCCAACCCCGACATTTT	48	57.26	25	-2.479	-	2.642
MHC-718	chr6_GL000256v2_alt	4422440	4422465	CTAGTTTGACGGTGGAGTGGAGTGA	52	57.97	25	-2.689	-	1.174
MHC-719	chr6_GL000256v2_alt	4430128	4430153	GCAGGGACATTTACTGAAGGAGGGA	52	57.99	25	-3.234	-	-0.044
MHC-720	chr6_GL000256v2_alt	4451058	4451083	TTGCATGTGTTGGGTAAACGGTAGC	48	58.27	25	-3.417	-	0.505
MHC-721	chr6_GL000256v2_alt	4639398	4639423	GAGAGACGAAGGGTGAGTGAGACAG	56	58.11	25	-3.473	-	0.574
MHC-722	chr6_GL000256v2_alt	4663046	4663071	GGGGCATTTCCTTTCCAAGTCCTTC	52	58.01	25	-2.655	-	0.364
MHC-723	chr6_GL000256v2_alt	4700616	4700641	TCCTTCACAAATGCCACTAAACCCC	48	57.43	25	-1.593	-	1.324
MHC-724	chr6_GL000256v2_alt	4723817	4723842	GACCCTGGTTTACTGCATCAGCTTG	52	58.1	25	-2.856	-	-0.186
