# Supplementary material for: Targeted and complete genomic sequencing of the major histocompatibility complex in haplotypic form of individual heterozygous samples
Source: HighWire-hosted journal article supplement (doi:10.1101/gr.278588.123), 2024-09-26
Supplement: Supplemental_Table_S4.xlsx [file Supplemental_Table_S4.xlsx]

## Sheet: qPCR primers and probes
Supplemental Table S4: qPCR Primer and Probe Sequences
Probe ID	Chr	Probe locus	Forward Sequence (5'-3')	Reverse Sequence (5'-3')	5' 6-FAM/Probe Squence/3' IABKFQ (5'-3')
MHC-315	6	31525429	GTTCTTACTCCAAGGTCACG	CCCTGCAAAACCTGTGTT	TCACTTACACGGCTTCCCCATCC
MHC-317	6	31790219	TACCCCAAATCCCATCCA	CCCTGTAATTATCCCTGCCA	TCTAGTGATTTCTCCCCAGTGCAAGC
MHC-321	6	32124889	GGCCTCTAGGTTTCTGTCTT	CAGATCACAATGGGAGAAGG	AGGCAGGATCATTAGCAACATGGGA
MHC-324	6	32473925	TGAGTGTGTGAGTGTGTTTAGG	TGGTGCAATAAGGACCAGTTTA	TGGAAGGAACATGGTTGTAAATCCGGA
MHC-329	6	32956919	GGTGGAAGGGCATAGGAATAG	TTGTCCTCACCTTGGTCTTG	ACACTGCAATTTCTCTGGGTGAGAGG
MHC-332	6	33255132	GGAGTACTGGTCTGGACTTAGA	GTCAGCTGCTGCTTCATACT	TAGCAGAGGAGTGACCAGAGGAAACA
ACTB	7	5534709	TCACCCACACTGTGCCCATCTACGA	CAGCGGAACCGCTCATTGCCAATGG	ATGCCCTCCCCCATGCCATCCTGCGT
